# Supplementary material for: Targeted Amino Acid Substitutions in a Trichoderma Peptaibol Confer Activity against Fungal Plant Pathogens and Protect Host Tissues from Botrytis cinerea Infection
Source: PubMed Central journal article supplement (PMC7589190; doi:10.3390/ijms21207521), 2020-10-12
Supplement: ijms-21-07521-s001.pdf [file ijms-21-07521-s001.pdf]

## SUPPORTING INFORMATION

**Targeted amino acid substitutions in a *Trichoderma* peptaibol confer activity against fungal plant pathogens and protect host tissues from *Botrytis cinerea* infection**

**M. De Zotti,<sup>\*,1</sup> L. Sella,<sup>2</sup> A. Bolzonello,<sup>2</sup> L. Gabbatore,<sup>1</sup> C. Peggion,<sup>1</sup> A. Bortolotto,<sup>1,2</sup>  
I. Elmaghraby,<sup>2,3</sup> S. Tundo,<sup>2</sup> F. Favaron<sup>2</sup>**

<sup>1</sup>*Department of Chemistry, University of Padova, Via Marzolo 1, 35131 Padova, Italy*

<sup>2</sup>*Department of Land, Environment, Agriculture and Forestry, University of Padova, Viale dell'Università 16, 35020, Legnaro (PD), Italy.*

<sup>3</sup>*Agricultural Research Center, Central Laboratory of Organic Agriculture, 9, Cairo Univ. St., Giza 12619, Egypt*

\*E-mail: [marta.dezotti@unipd.it](mailto:marta.dezotti@unipd.it)

### Table of contents

1. Figures S1-S4 - Structural models: views both perpendicular and along the helix axis.
2. Figure S5-S7 - Antifungal activity and CD spectra
3. Peptide characterization: HPLC profiles, ESI-HRMS and NMR spectra.

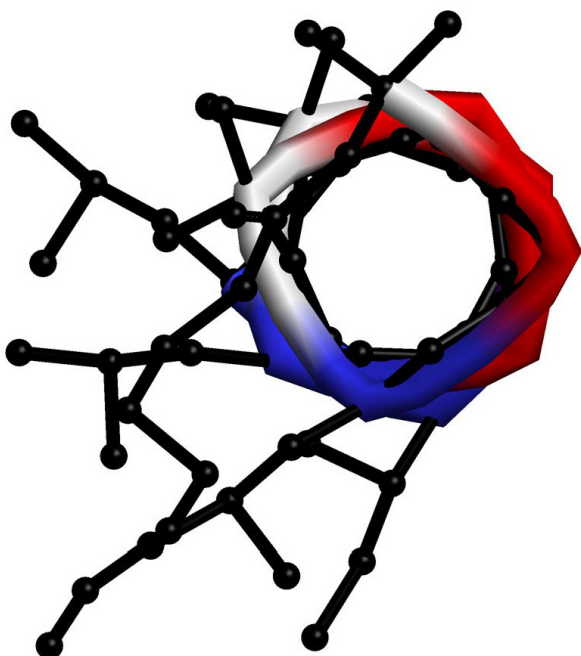

native trichogin GA IV

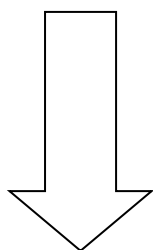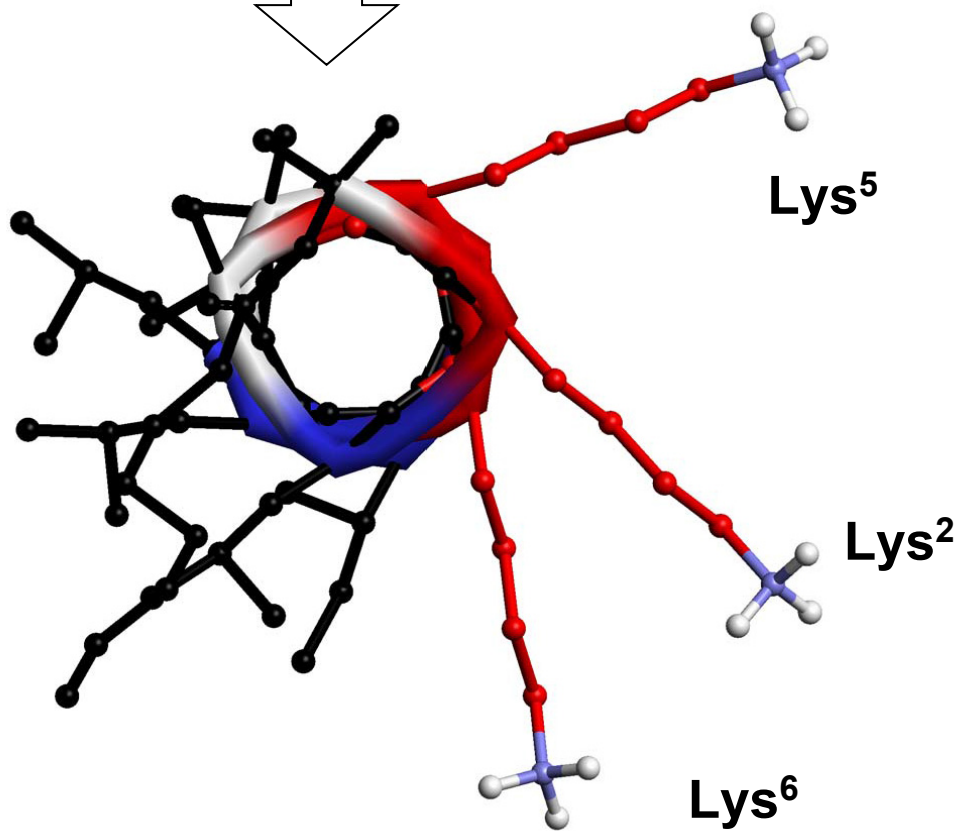

Figure S1. 3D-structure for compounds 1-5 and 7. View along the helical axis.

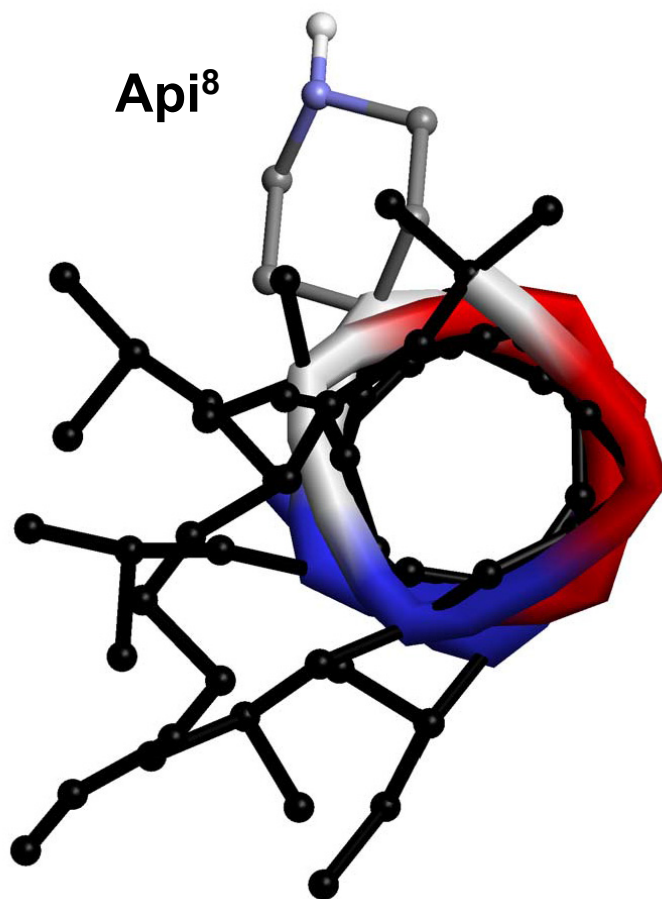

**Figure S2.** 3D-structure for compound **8**. View along the helical axis.

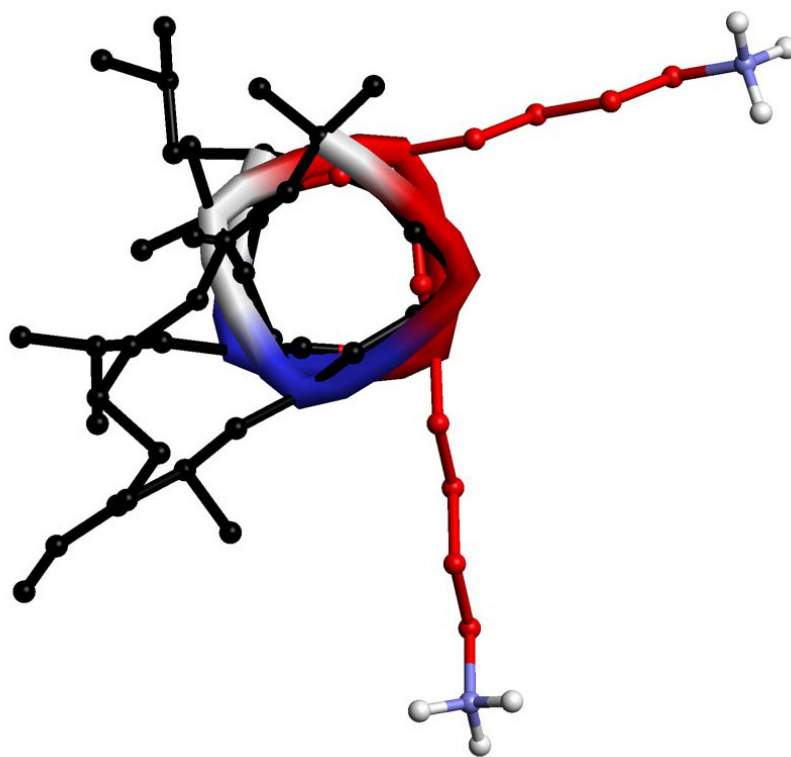

**Figure S3.** 3D-structure for compounds **4c** and **4c1**. View along the helical axis.

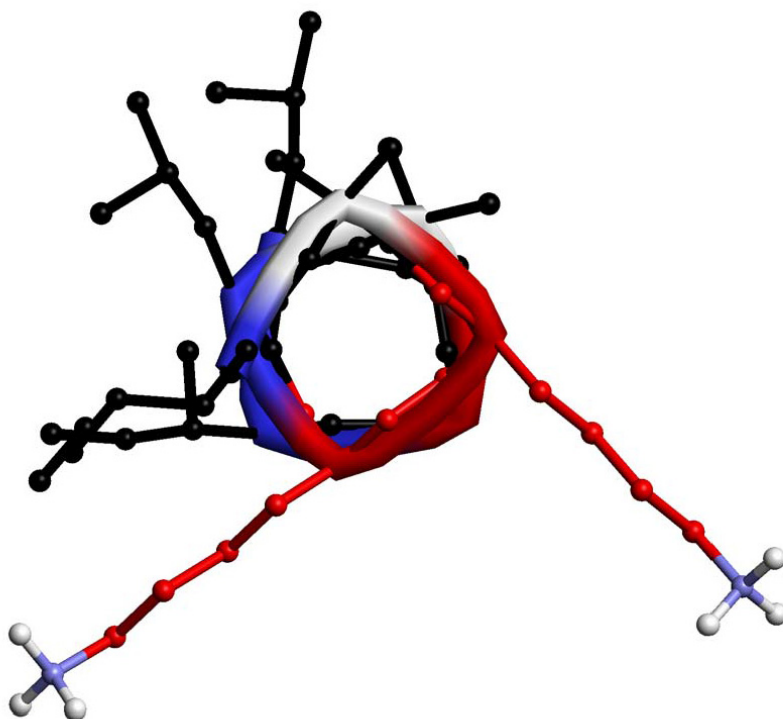

**Figure S4.** 3D-structure for compound **4c2**. View along the helical axis.

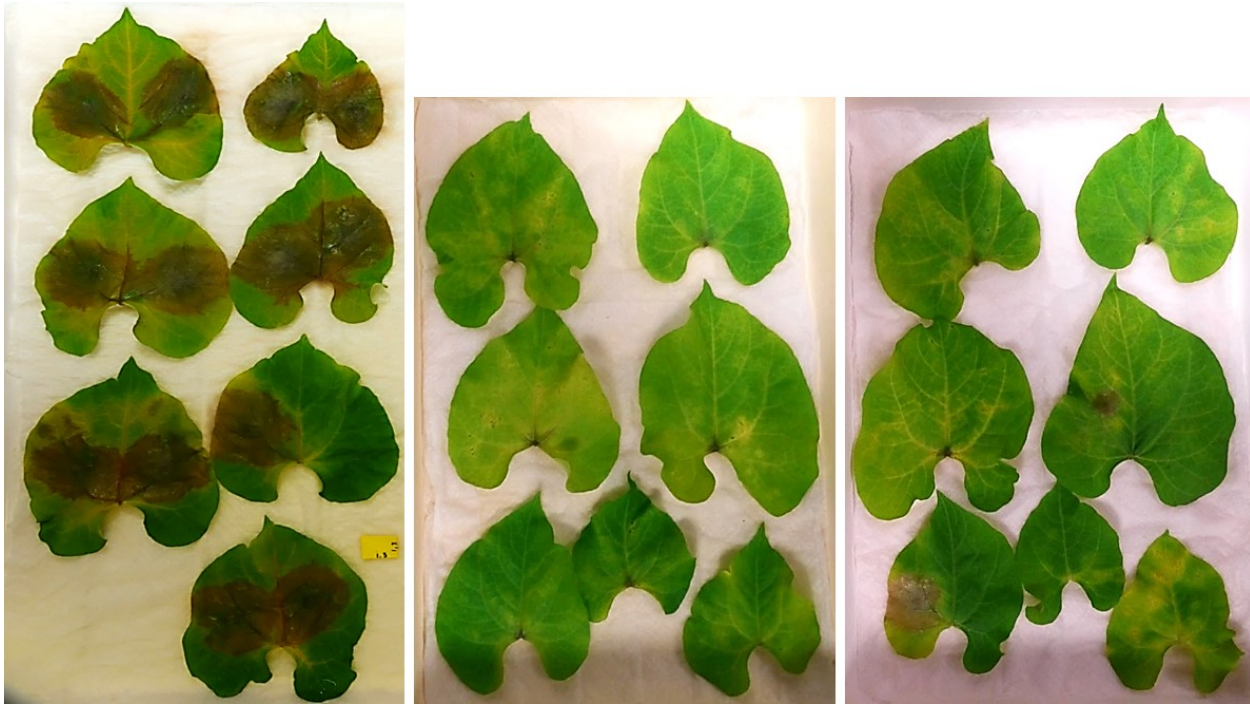

**Untreated control**

**50  $\mu\text{M}$  peptide 4**

**15  $\mu\text{M}$  peptide 4**

**Fig. S5.** Representative symptoms produced by *Botrytis cinerea* on common bean leaves (Borlotto var. Teggia) untreated or treated with the peptide 4 at 50  $\mu\text{M}$  or 15  $\mu\text{M}$  at 7 days post inoculation (dpi). Leaves were arranged on moist towels in plastic trays and inoculated on two or three points with 10  $\mu\text{L}$  of a conidial suspension containing  $2.5 \times 10^6 \text{ mL}^{-1}$  *B. cinerea* conidia in potato dextrose broth (PDB).

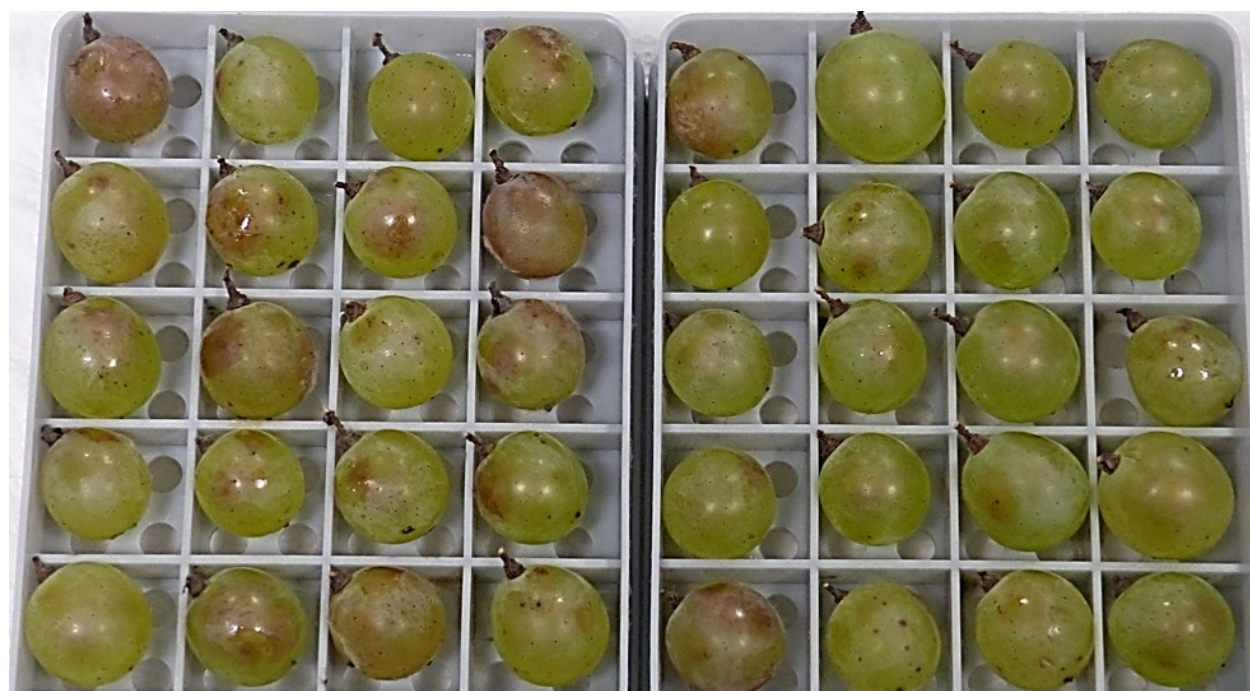

**Untreated control**

**50  $\mu$ M peptide 4**

**Fig. S6.** Representative symptoms produced by *Botrytis cinerea* on grape berries (cv. Glera) untreated or treated with the peptide 4 at 50  $\mu$ M at 4 days post inoculation (dpi). Ripe grape berries were surface-sterilized, rinsed with sterile water, separately arranged on a plastic tray and sprayed with *B. cinerea* conidia at a concentration of  $1.85 \times 10^6$  mL<sup>-1</sup>.

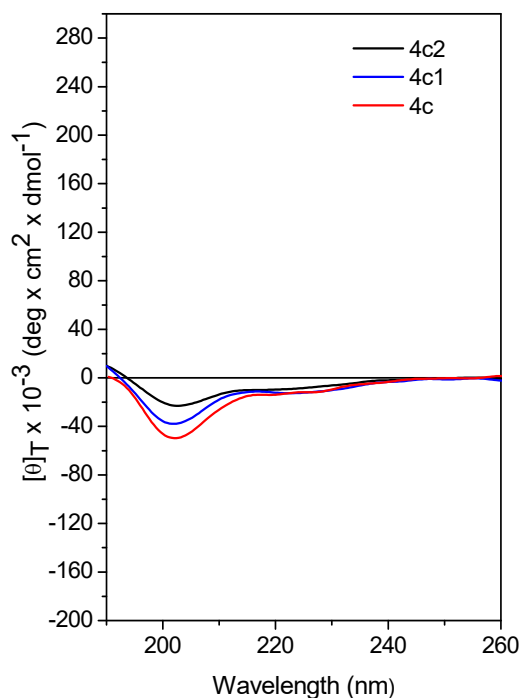

**Fig. S7.** CD profiles acquired for peptides 4c, 4c1 and 4c2 in aqueous solution (peptide concentration:  $10^{-4}$  M).

## Peptide Characterization (HPLC, ESI-HRMS, <sup>1</sup>H NMR)

**Table S1.** Sequences of the synthesized trichogin analogs.

| n°  | peptide sequence <sup>a</sup>                                                                        |
|-----|------------------------------------------------------------------------------------------------------|
| 1   | <i>n</i> Oct-Aib-Lys <sup>2</sup> -Leu-Aib-Lys <sup>5</sup> -Gly-Leu-Aib-Gly-Ile-Lol                 |
| 2   | <i>n</i> Oct-Aib-Lys <sup>2</sup> -Leu-Aib-Gly <sup>5</sup> -Gly-Leu-Aib-Gly-Ile-Lol                 |
| 3   | <i>n</i> Oct-Aib-Gly <sup>2</sup> -Leu-Aib-Lys <sup>5</sup> -Gly-Leu-Aib-Gly-Ile-Lol                 |
| 4   | <i>n</i> Oct-Aib-Gly <sup>2</sup> -Leu-Aib-Lys-Lys-Leu-Aib-Gly-Ile- Lol                              |
| 4c  | <i>n</i> Oct-Aib - Lys <sup>2</sup> -Lys-Leu-Aib-Gly-Ile- Lol                                        |
| 4r  | <i>n</i> Oct-Aib-Gly <sup>2</sup> -Leu-Aib-Lys <sup>5</sup> -Lys-Leu-Aib-Gly-Ile-Leu-NH <sub>2</sub> |
| 4c1 | <i>n</i> Oct-Aib-Gly <sup>2</sup> -Leu-Aib-Lys <sup>5</sup> -Lys-Leu - Leu-NH <sub>2</sub>           |
| 4c2 | <i>n</i> Oct-Aib - Lys <sup>2</sup> -Lys-Leu-Aib-Gly-Ile- Leu-NH <sub>2</sub>                        |
| 5   | <i>n</i> Oct-Aib-Gly <sup>2</sup> -Leu-Aib-Gly <sup>5</sup> -Lys-Leu-Aib-Gly-Ile- Lol                |
| 6   | <i>n</i> Oct-Aib-Gly <sup>2</sup> -Leu-Aib-Lys <sup>5</sup> -Aib-Leu-Aib-Gly-Ile- Lol                |
| 7   | <i>n</i> Oct-Aib-Lys <sup>2</sup> -Leu-Aib-Gly <sup>5</sup> -Lys-Leu-Aib-Gly-Ile- Lol                |
| 8   | <i>n</i> Oct-Aib-Gly <sup>2</sup> -Leu-Aib-Gly <sup>5</sup> -Gly-Leu-Api <sup>8</sup> -Gly-Ile-Lol   |

<sup>a</sup> *n*Oct, *n*-octanoyl; Aib, α-aminoisobutyric acid; Lol, leucinol; Api, 4-aminopiperidine-4-carboxylic acid.

Abbreviations:

ESI, Electron Spray Ionization

HRMS, High Resolution Mass Spectrometry

Eluants for HPLC:

A: H<sub>2</sub>O/CH<sub>3</sub>CN 9:1 + 0.05% TFA

B: CH<sub>3</sub>CN/H<sub>2</sub>O 9:1 + 0.05% TFA

peptide **1** (**K25**)

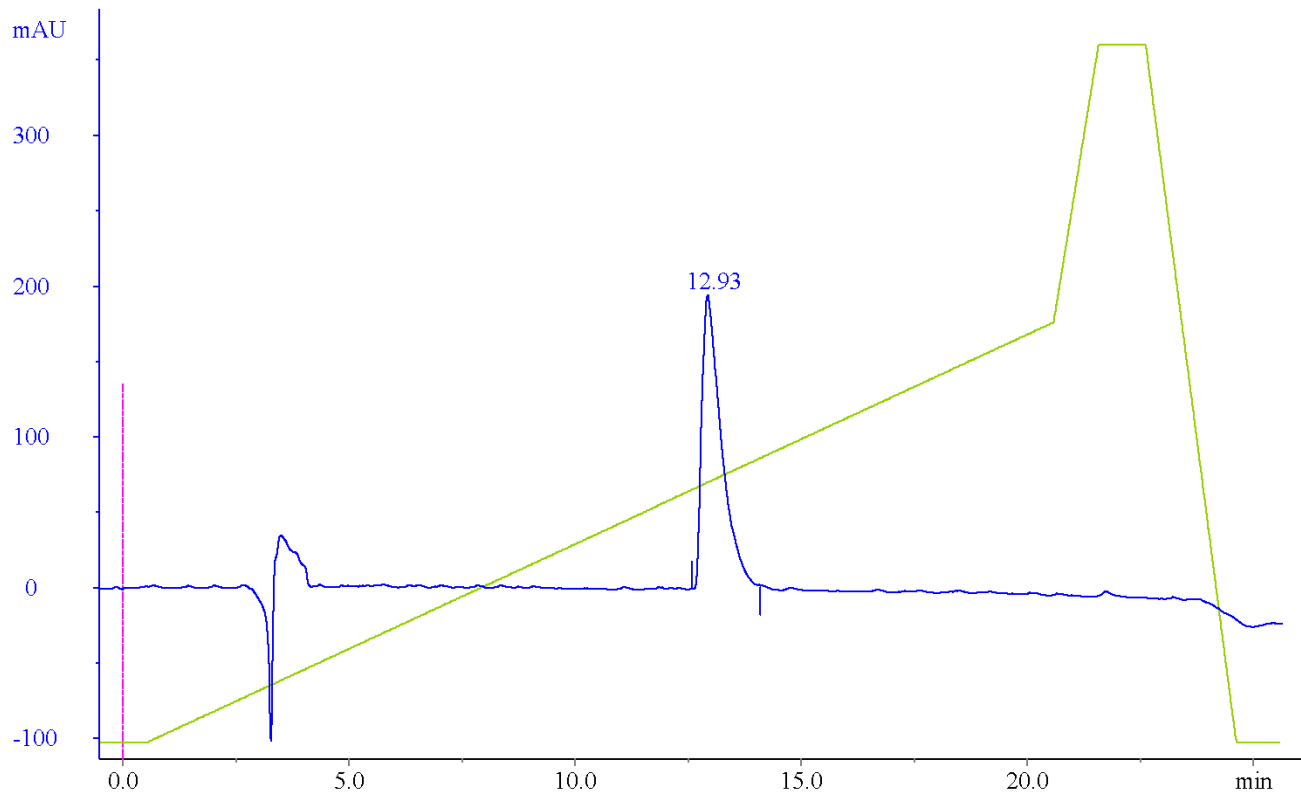

HPLC profile obtained for peptide **1** (gradient: 50→80%B [CH<sub>3</sub>CN/H<sub>2</sub>O 9:1 + 0.05% TFA] in 20 minutes; flow rate: 1mL/min; C<sub>18</sub> Phenomenex 300Å) Retention time (R<sub>t</sub>) = 12.93 min. Detection Wavelength: 216 nm.



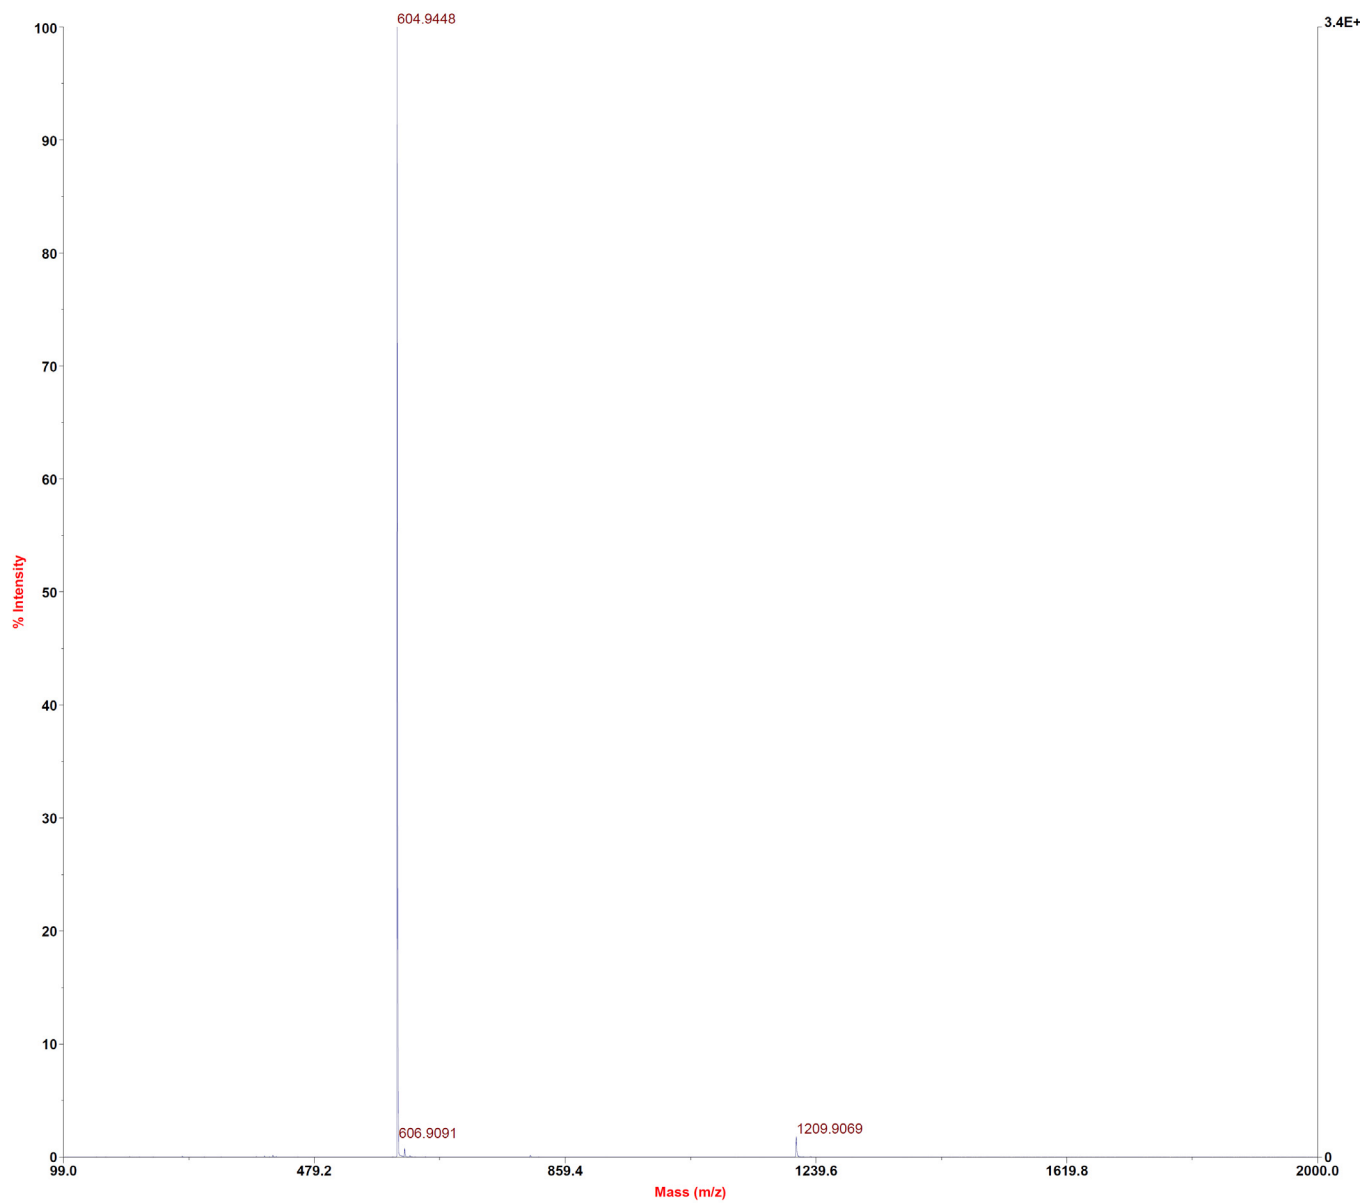

ESI-HRMS for peptide **1**:  $[M+H]^+$  calcd. 1208.8632;  $[M+H]^+$  found: 1208.8896 (*monoisotopic*),  $[M+2H]^{2+}$  found: 604.9448.

peptide 2 (K2)

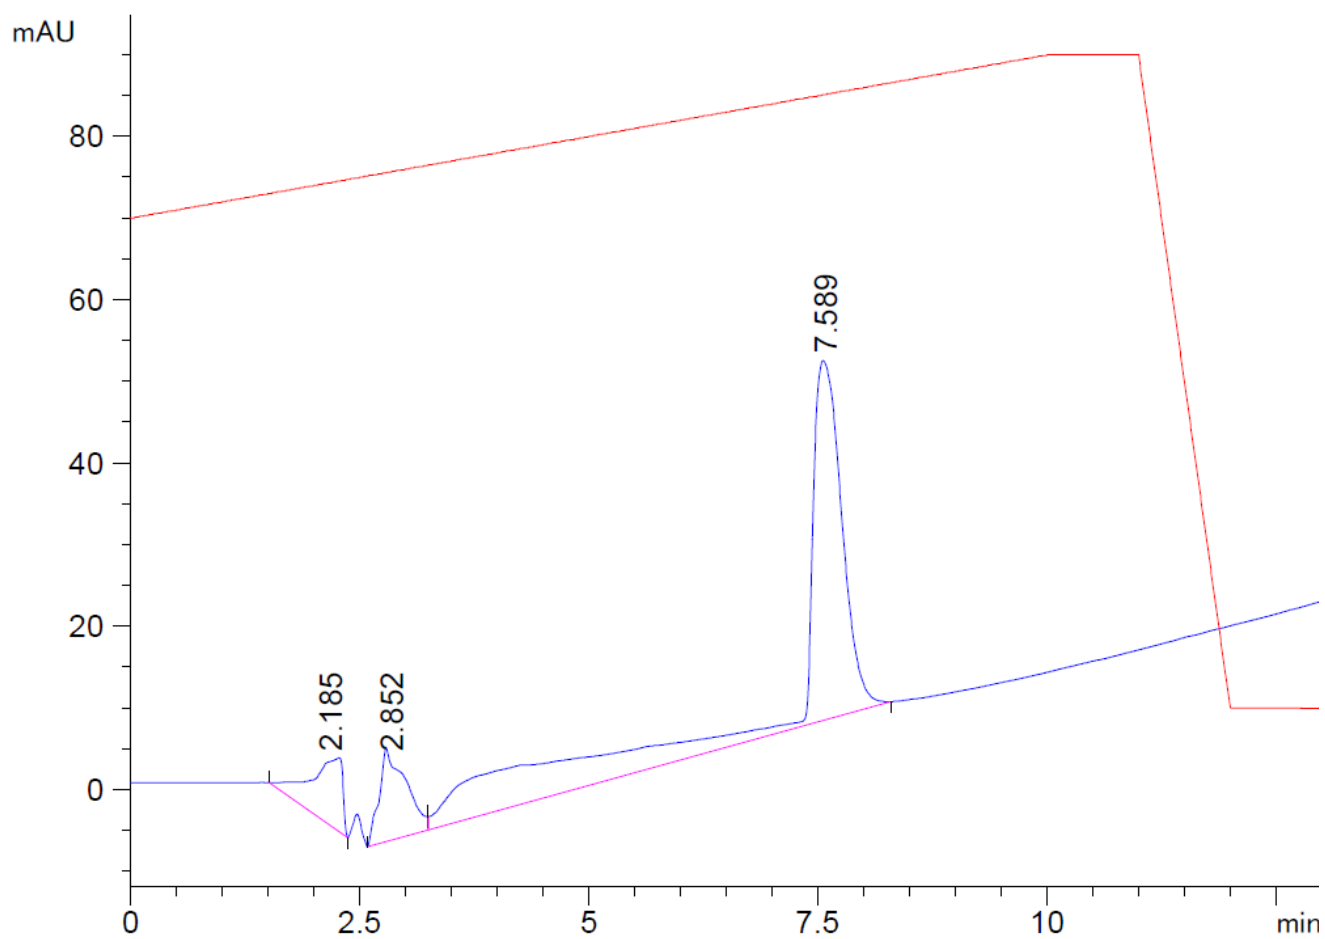

HPLC profile obtained for peptide 2 (gradient: 70→90%B [B: CH<sub>3</sub>CN/H<sub>2</sub>O 9:1 + 0.05% TFA] in 10 minutes; flow rate: 1mL/min; C<sub>18</sub> Phenomenex 100Å) Retention time (R<sub>t</sub>) = 7.59 min. Detection Wavelength: 226 nm.

2KV - Dil 1-100 in acqua

Formaggio-2019-05-09 K2-OL 4H 17 (0.344) Cm (17:19-3:5)

1: TOF MS ES+  
1.27e7

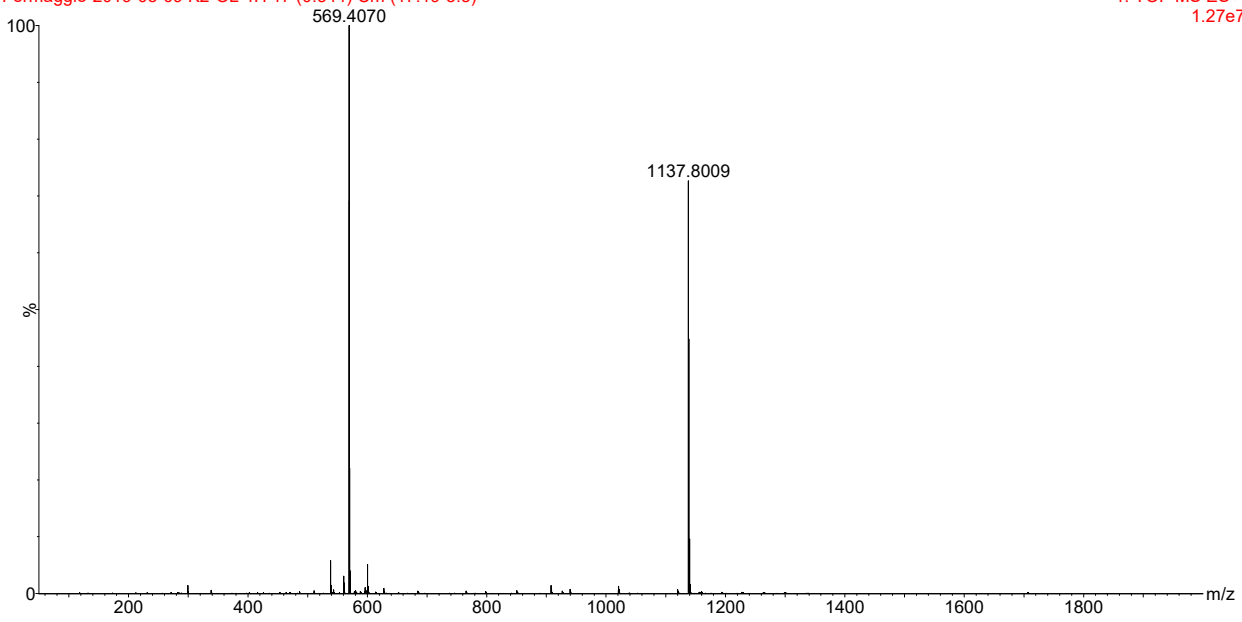

2KV - Dil 1-100 in acqua

Formaggio-2019-05-09 K2-OL 4H 17 (0.344) Cm (17:19-3:5)

1: TOF MS ES+  
1.27e7

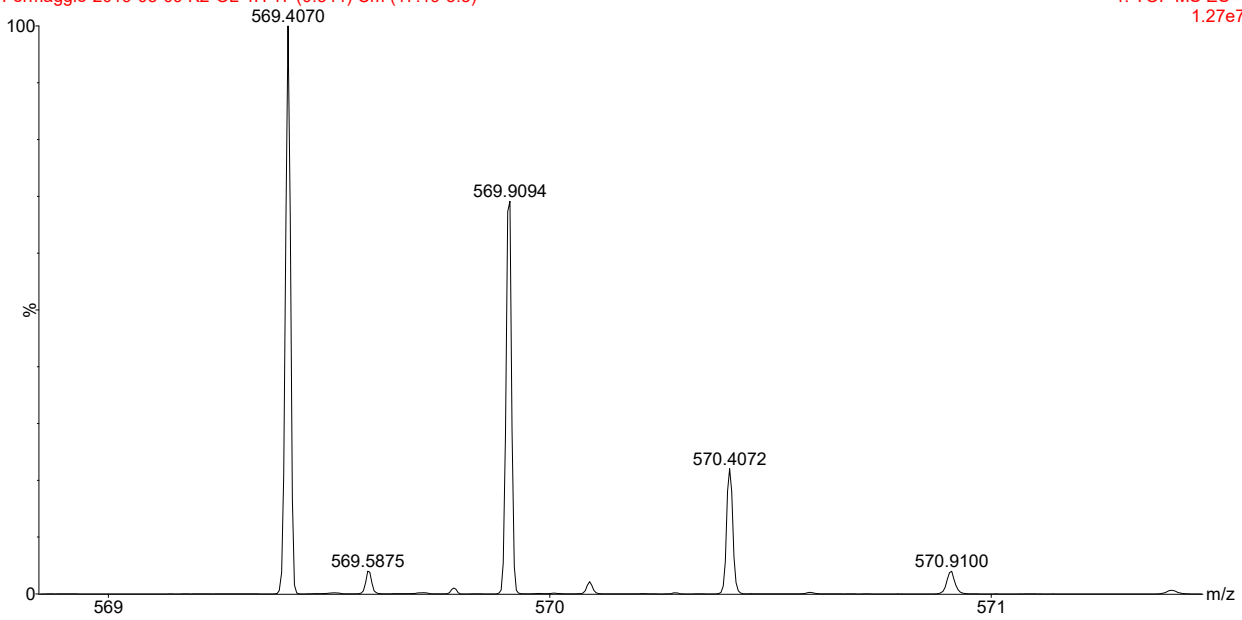

ESI-HRMS for peptide 2:  $[M+H]^+$  calcd. 1137.7997;  $[M+H]^+$  found: 1137.8009 (*monoisotopic*),  $[M+2H]^{2+}$  found: 569.4070.

## peptide 3 (K5)

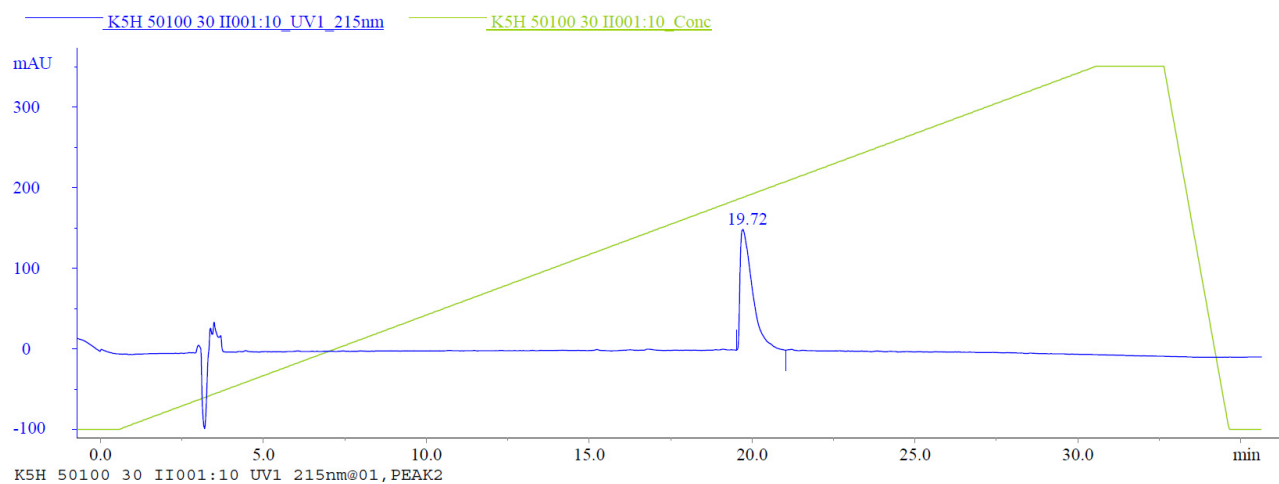

HPLC profile obtained for peptide 3 (gradient: 50→100%B [B: CH<sub>3</sub>CN/H<sub>2</sub>O 9:1 + 0.05% TFA] in 30 minutes; flow rate: 1mL/min; C<sub>18</sub> Phenomenex 300Å) Retention time (R<sub>t</sub>) = 19.72 min. Detection Wavelength: 215 nm.

Applied Biosystems Mariner System 5220

Mariner Spec /8:11 (T/0.62:0.90) ASC[BP = 569.4, 12193]

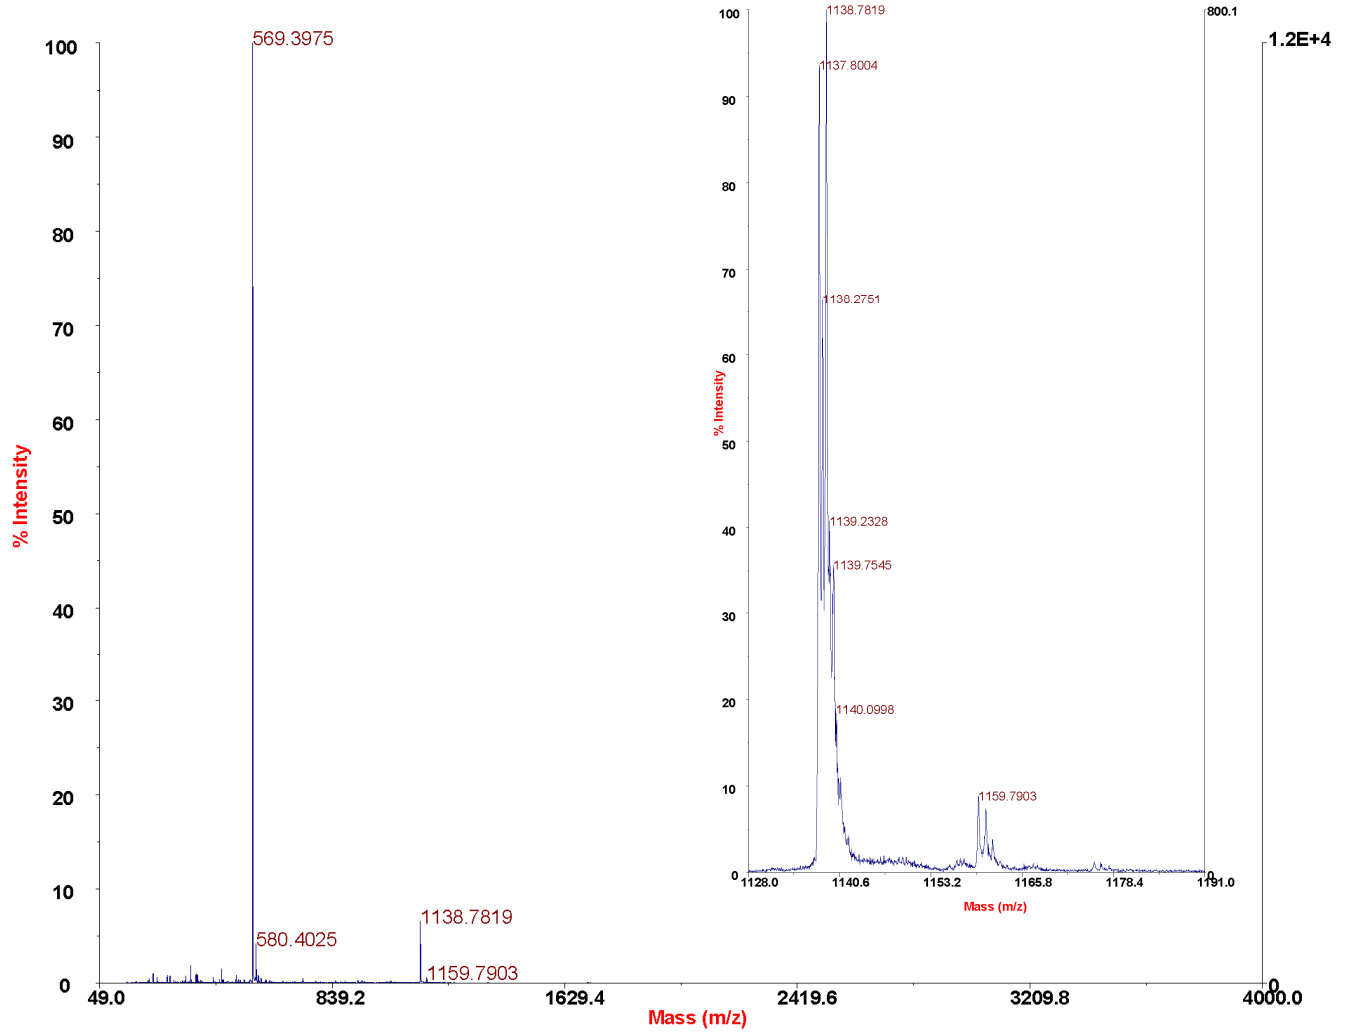

ESI-HRMS for peptide 3:  $[M+H]^+$  calcd. 1137.7997;  $[M+H]^+$  found: 1137.8004 (monoisotopic),  $[M+Na]^+$  found: 1159.7903 (monoisotopic),  $[M+2H]^{2+}$  found: 569.3975.

peptide 4 (K56)

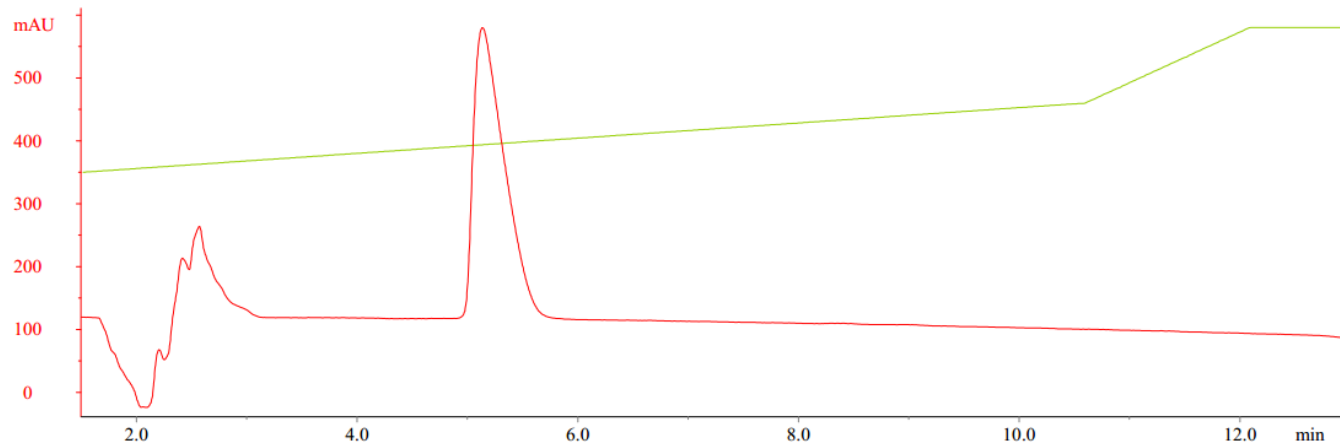

HPLC profile obtained for peptide 4 (gradient: 60→80%B [B: CH<sub>3</sub>CN/H<sub>2</sub>O 9:1 + 0.05% TFA] in 10 minutes; flow rate: 1mL/min; C<sub>18</sub> Agilent Zorbax RX-C18) Retention time (R<sub>t</sub>) = 5.14 min. Detection Wavelength: 226 nm.

# Applied Biosystems Mariner System 5220

Mariner Spec /7:11 (T /0.54:0.91) -3:5 (T -0.54:0.91) ASC[BP = 604.9, 16613]

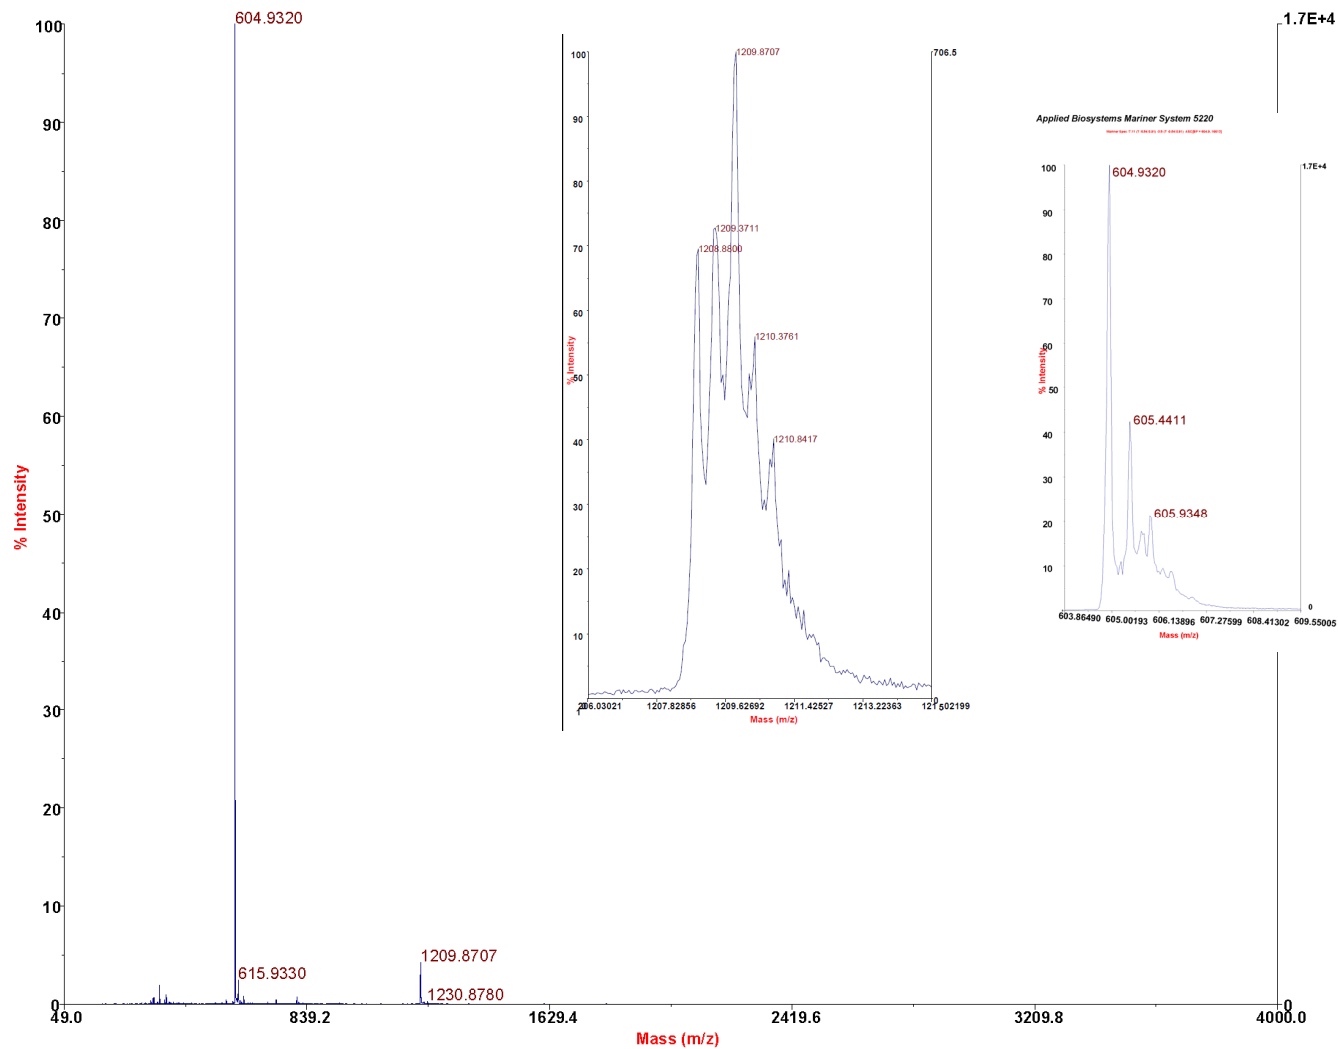

ESI-HRMS for peptide 4:  $[M+H]^+$  calcd. 1208.8732;  $[M+H]^+$  found: 1208.8800 (*monoisotopic*),  $[M+Na]^+$  found: 1230.8780 (*monoisotopic*),  $[M+2H]^{2+}$  found: 604.9320.

peptide **4r** (K56-NH2)

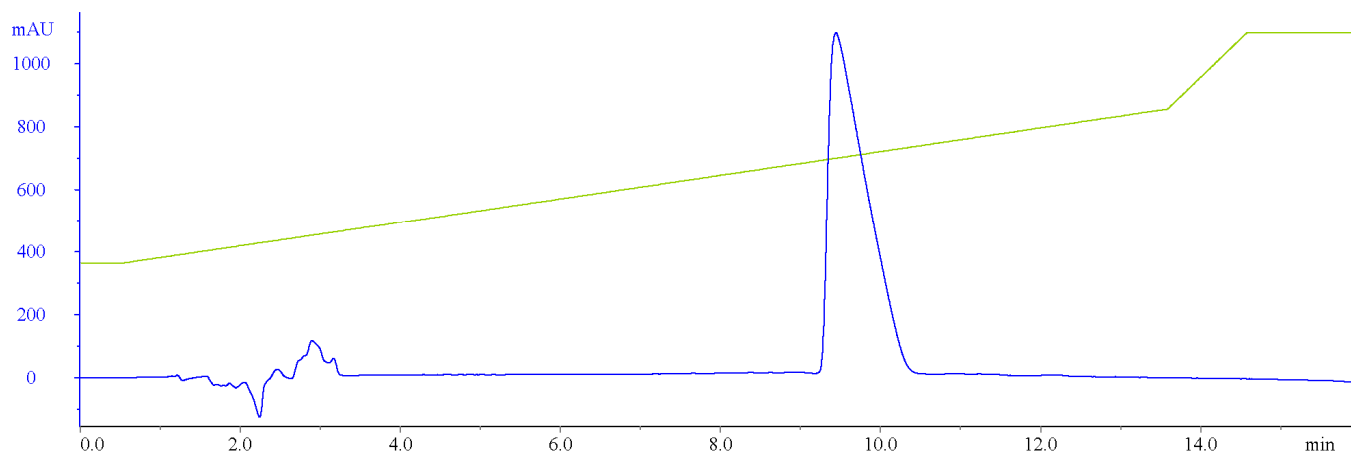

HPLC profile obtained for peptide **4r** (gradient: 40→80%B [CH<sub>3</sub>CN/H<sub>2</sub>O 9:1 + 0.05% TFA] in 15 minutes; flow rate: 1mL/min; C<sub>18</sub> Phenomenex 300Å) Retention time (R<sub>t</sub>) = 9.44 min. Detection Wavelength: 208 nm.



1.5 KV

Formaggio-19-02-18-CPA pul 2 26 (0.496) Cm (21:29-4:11)

1: TOF MS ES+  
8.35e7

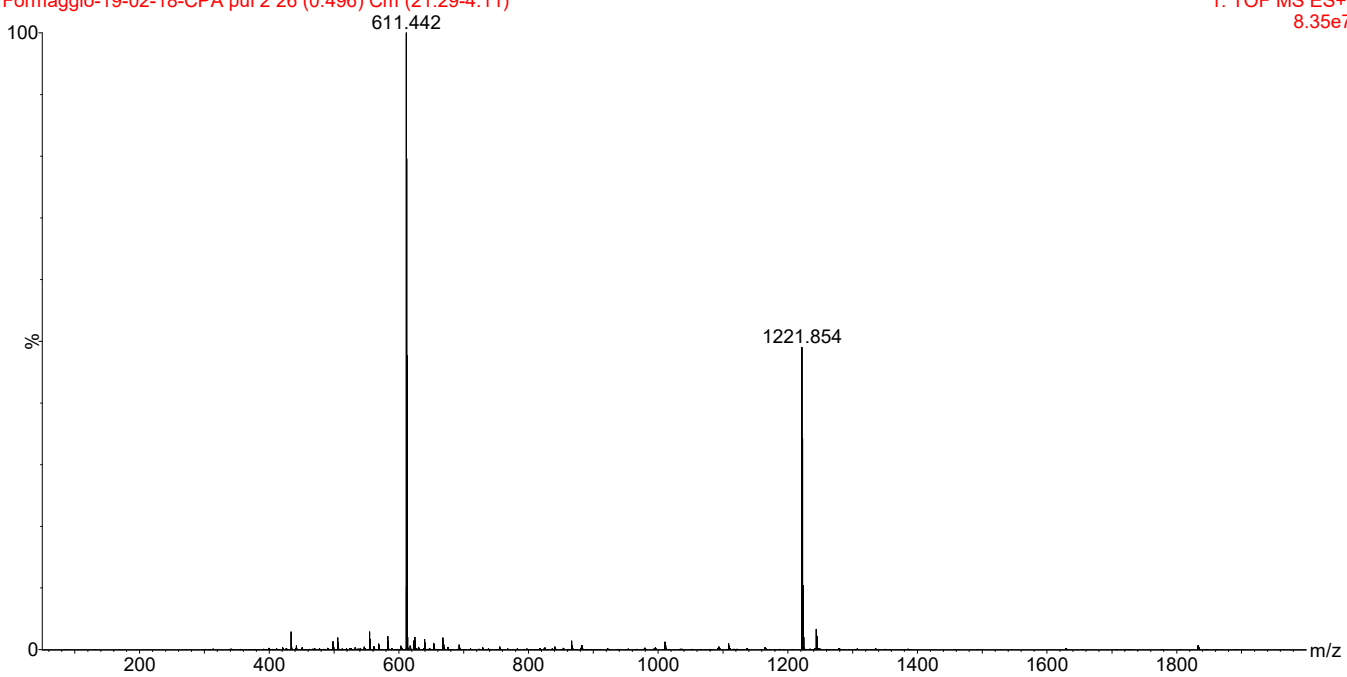

ESI-HRMS for peptide **4r**:  $[M+H]^+$ <sub>calcd.</sub> 1221.8584;  $[M+H]^+$ <sub>found:</sub> 1221.8540 (*monoisotopic*),  $[M+2H]^{2+}$ <sub>found:</sub> 611.4420.

## peptide 4c

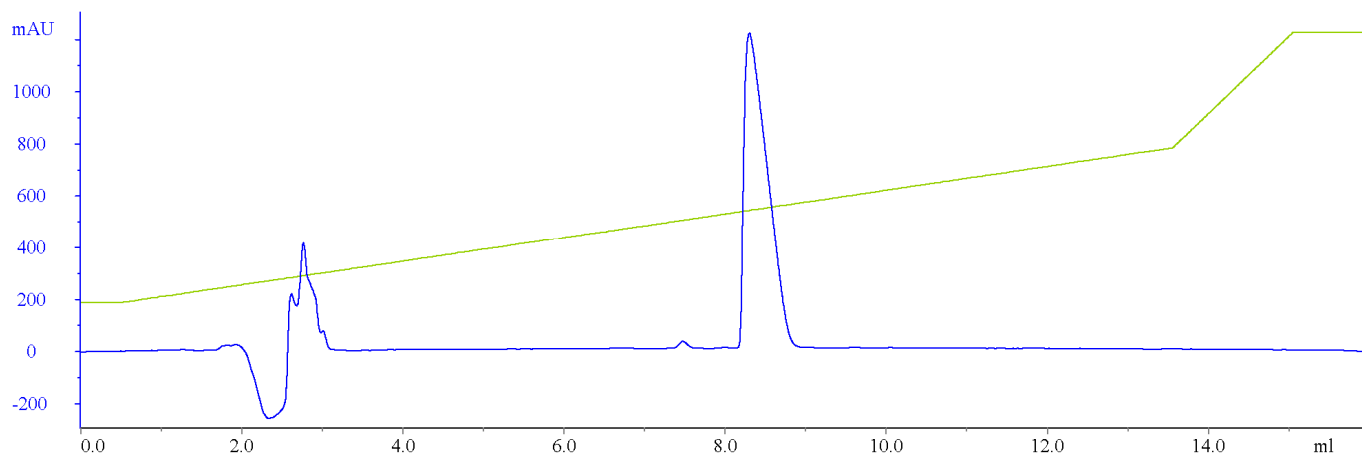

HPLC profile obtained for peptide **4c** (gradient: 30→70%B [CH<sub>3</sub>CN/H<sub>2</sub>O 9:1 + 0.05% TFA] in 15 minutes; flow rate: 1mL/min; C<sub>18</sub> Phenomenex 300Å) Retention time (R<sub>t</sub>) = 8.31 min. Detection Wavelength: 208 nm.

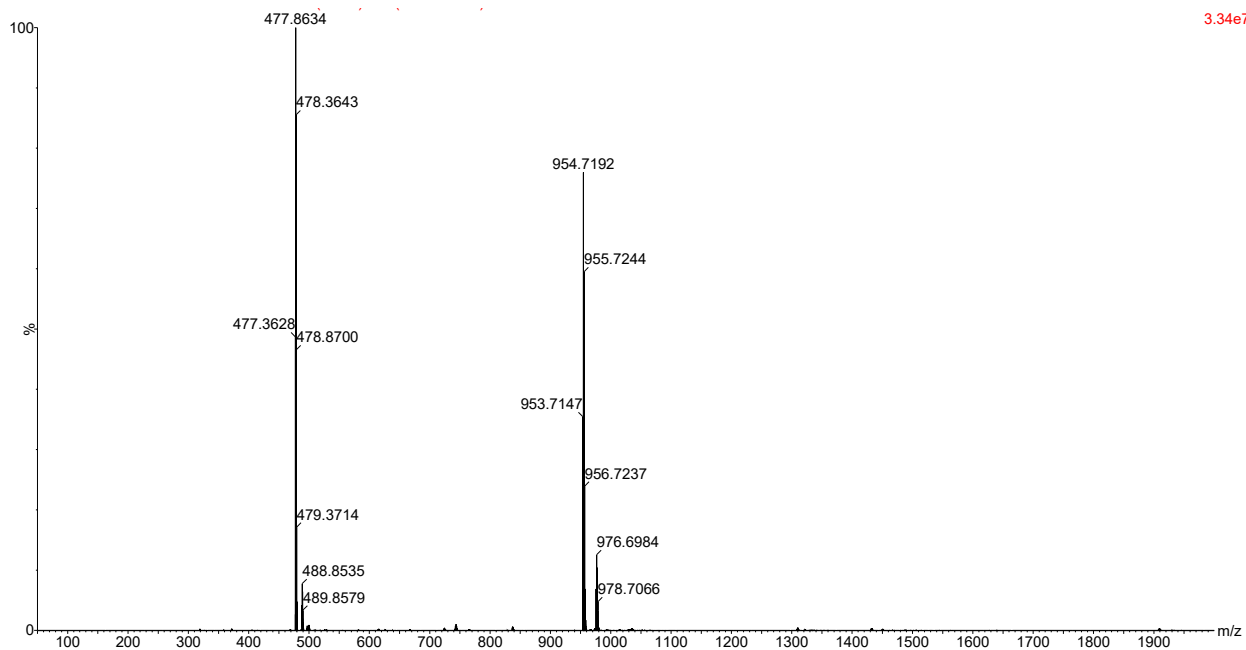

ESI-MS for peptide **4c**: [M+H]<sup>+</sup><sub>calcd.</sub> 953.7049; [M+H]<sup>+</sup><sub>found:</sub> 953.7147 (*monoisotopic*) [M+Na]<sup>+</sup><sub>found:</sub> 975.6951, [M+2H<sup>2+</sup>]<sub>found:</sub> 477.3628.

peptide **4c1** (Oct-UGLUKKL-NH<sub>2</sub>)

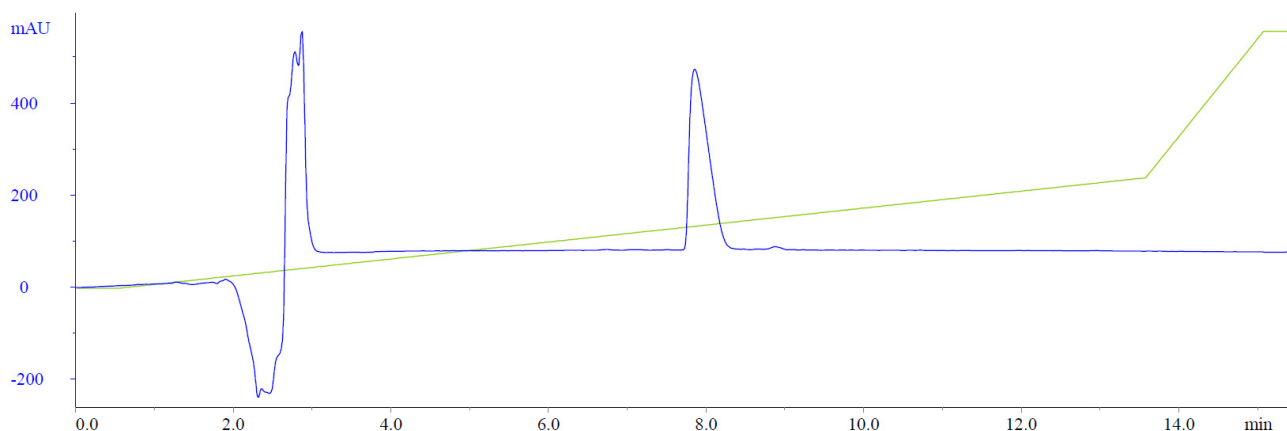

HPLC profile obtained for peptide **4c1** (gradient: 30→60%B [CH<sub>3</sub>CN/H<sub>2</sub>O 9:1 + 0.05% TFA] in 14 minutes; flow rate: 1 mL/min; C<sub>18</sub> Phenomenex 300Å) Retention time (R<sub>t</sub>) = 7.85 min. Detection Wavelength: 208 nm.

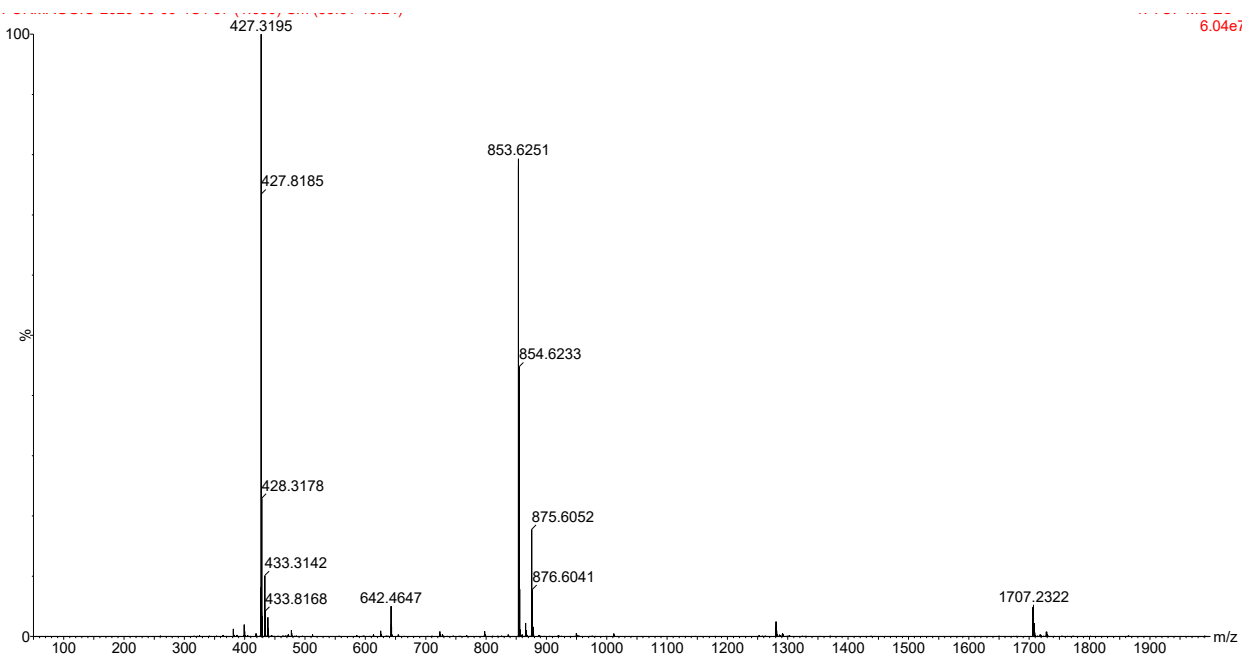

ESI-MS for peptide **4c1**: [M+H]<sup>+</sup><sub>calcd.</sub>: 853.6261; [M+H]<sup>+</sup><sub>found</sub>: 853.6251, [M+2H<sup>2+</sup>]<sub>found</sub>: 427.3195. [2M+H]<sup>+</sup><sub>found</sub>: 1707.2322.

peptide **4c2** (Oct-AibLLAibGIL-NH<sub>2</sub>)

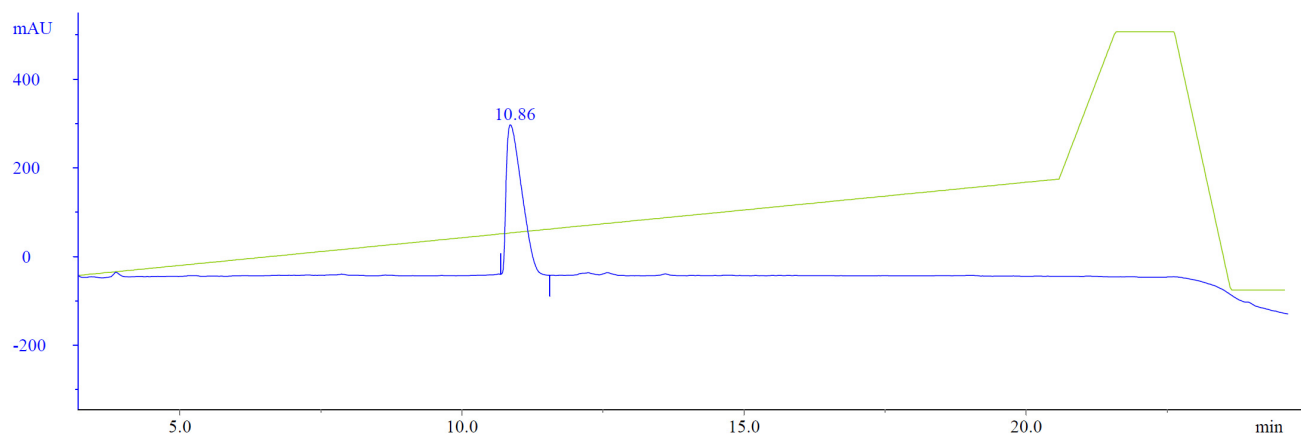

HPLC profile obtained for peptide **4c2** (gradient: 30→60%B [CH<sub>3</sub>CN/H<sub>2</sub>O 9:1 + 0.05% TFA] in 20 minutes; flow rate: 1mL/min; C<sub>18</sub> Phenomenex 300Å) Retention time (R<sub>t</sub>) = 10.86 min. Detection Wavelength: 208 nm.

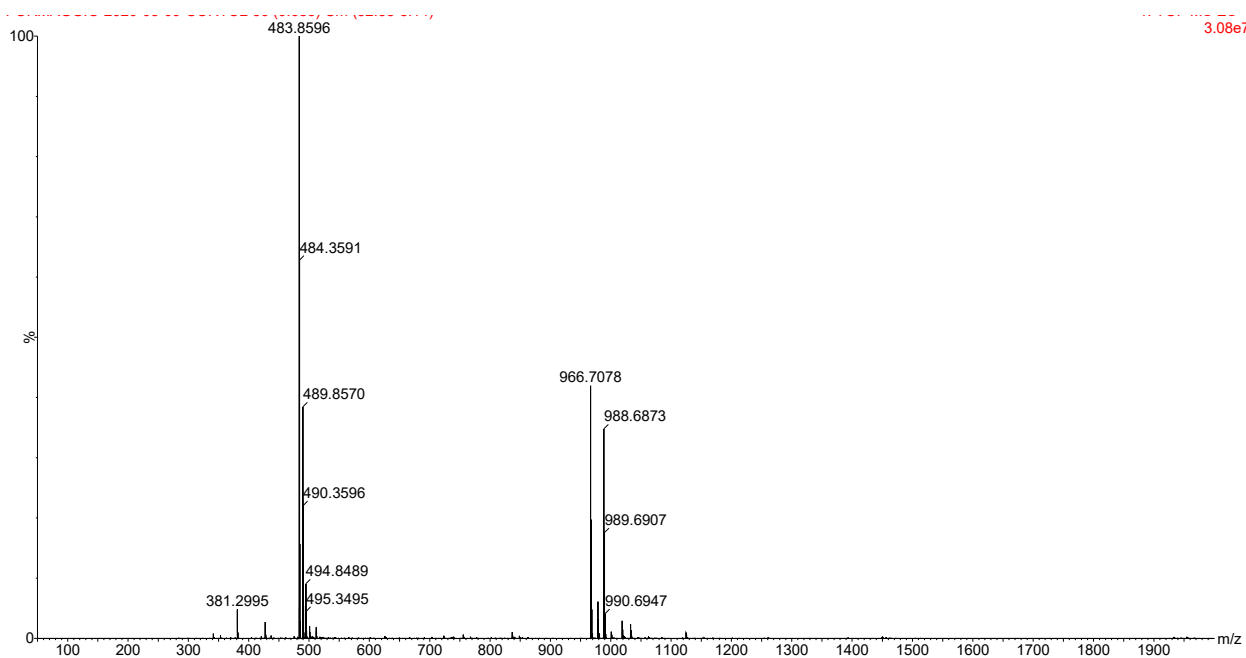

ESI-MS for peptide **4c2**: [M+H]<sup>+</sup><sub>calcd.</sub> 966.7001; [M+H]<sup>+</sup><sub>found</sub>: 966.7078, [M+Na]<sup>+</sup><sub>found</sub>: 988.6873, [M+2H<sup>2+</sup>]<sub>found</sub>: 483.8596.

peptide 5 (K6)

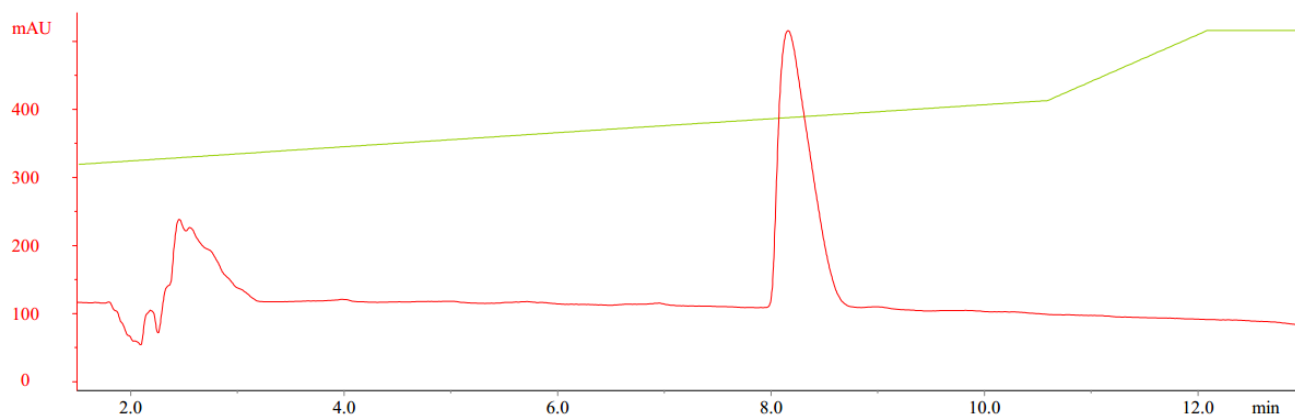

HPLC profile obtained for peptide 5 (gradient: 60→80%B [CH<sub>3</sub>CN/H<sub>2</sub>O 9:1 + 0.05% TFA] in 10 minutes; flow rate: 1mL/min; C<sub>18</sub> Agilent Zorbax RX-C18) R<sub>t</sub> = 8.16 min. Detection Wavelength: 216 nm.

Marta

Formaggio-05-04-19 LG T 42 (0.806) Cm (42:47-7:12)

1: TOF MS ES+  
7.89e6

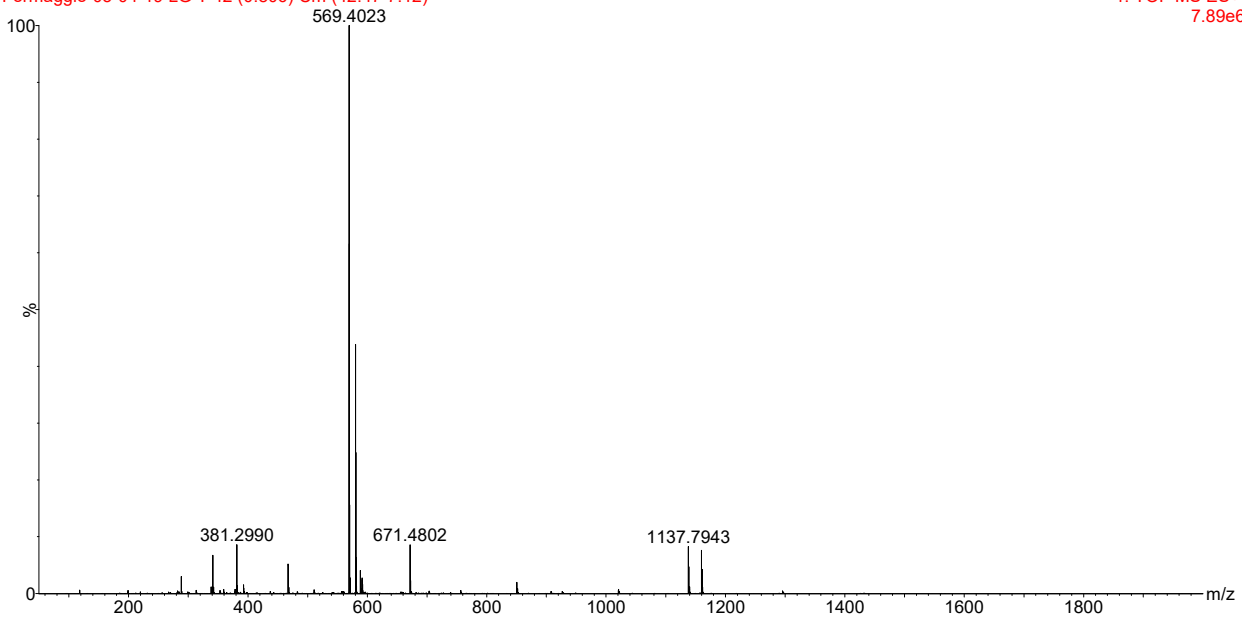

Marta

Formaggio-05-04-19 LG T 42 (0.806) Cm (42:47-7:12)

1: TOF MS ES+  
6.51e5

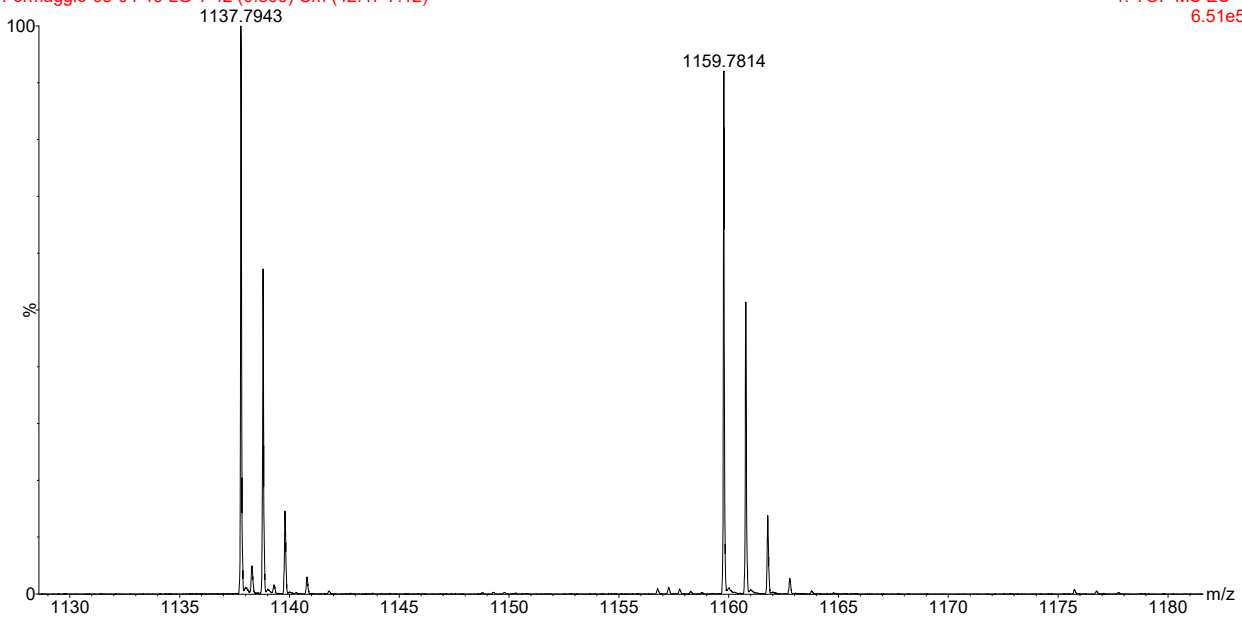

ESI-HRMS for peptide **5**:  $[M+H]^+$  calcd. 1137.7997;  $[M+H]^+$  found: 1137.7943 (*monoisotopic*),  $[M+Na]^+$  found: 1159.7814 (*monoisotopic*),  $[M+2H]^{2+}$  found: 569.4023. Peaks at 381.2990 and 671.4802 are impurities from samples injected before (the instrument was contaminated).

peptide **6** (K5U6)

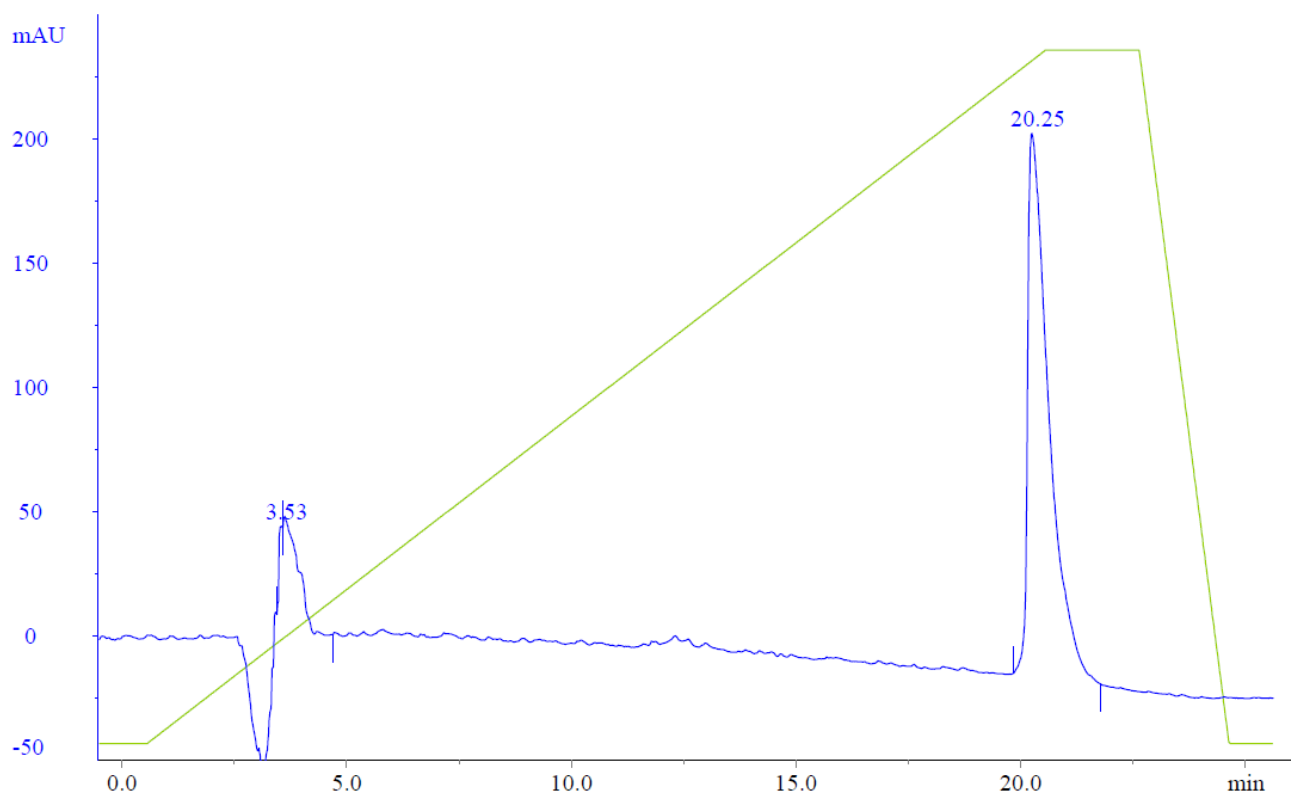

HPLC profile obtained for peptide **6** (gradient: 60→100%B [CH<sub>3</sub>CN/H<sub>2</sub>O 9:1 + 0.05% TFA] in 20 minutes; flow rate: 1mL/min; C<sub>18</sub> Phenomenex 300Å) R<sub>t</sub> = 20.25 min. Detection Wavelength: 216 nm.

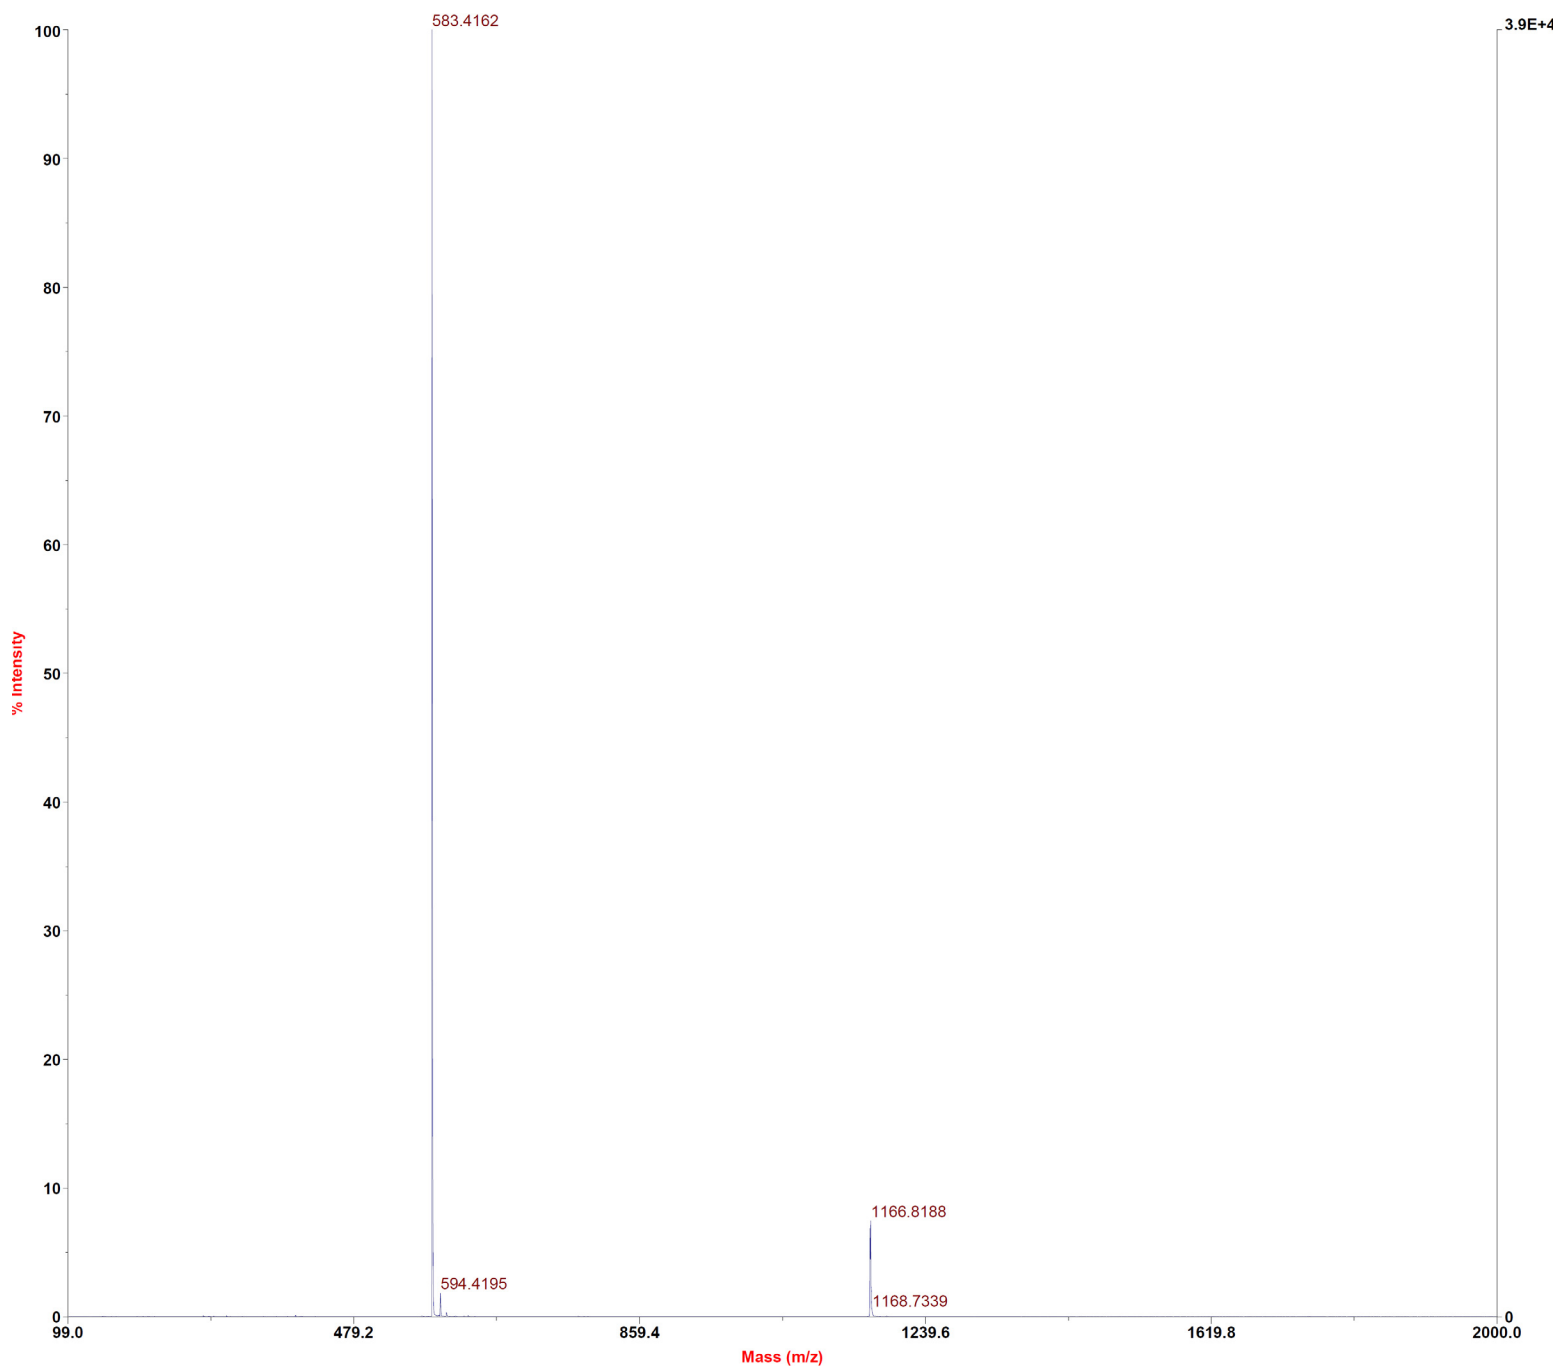

ESI-MS for peptide **6**:  $[M+H]_{\text{calcd.}}$  1165.8210;  $[M+H]_{\text{found:}}$  1165.8271 (*monoisotopic*),  $[M+2H^{2+}]_{\text{found:}}$  583.4162,  $[M+H+Na^{2+}]_{\text{found:}}$  594.4195.



## peptide 7 (K26)

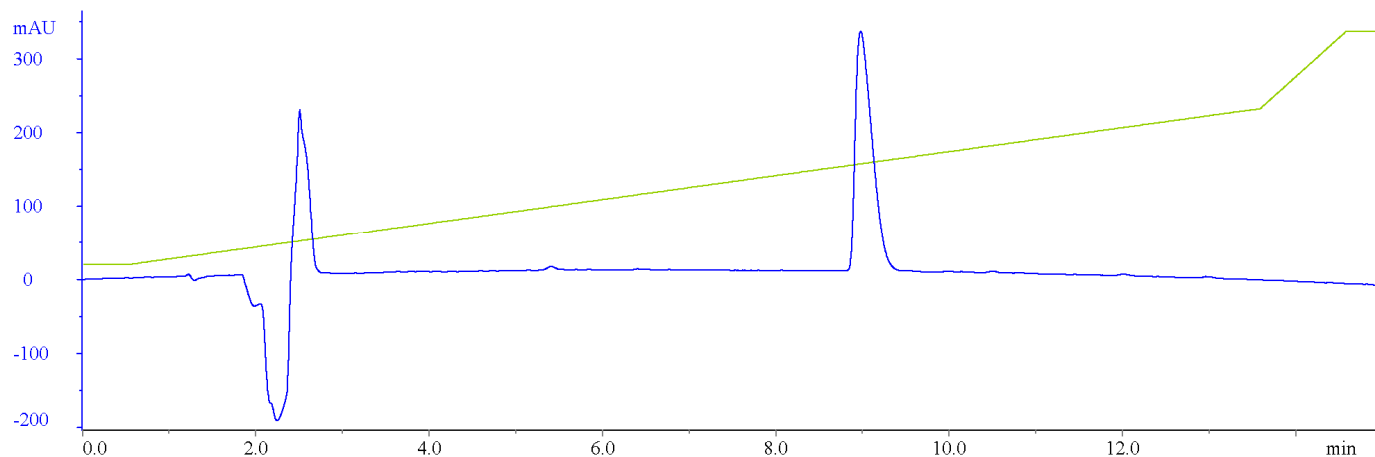

HPLC profile obtained for peptide 7 (gradient: 40→80%B [CH<sub>3</sub>CN/H<sub>2</sub>O 9:1 + 0.05% TFA] in 15 minutes; flow rate: 1mL/min; C<sub>18</sub> Phenomenex 300Å) R<sub>t</sub> = 8.97 min. Detection Wavelength: 208 nm.

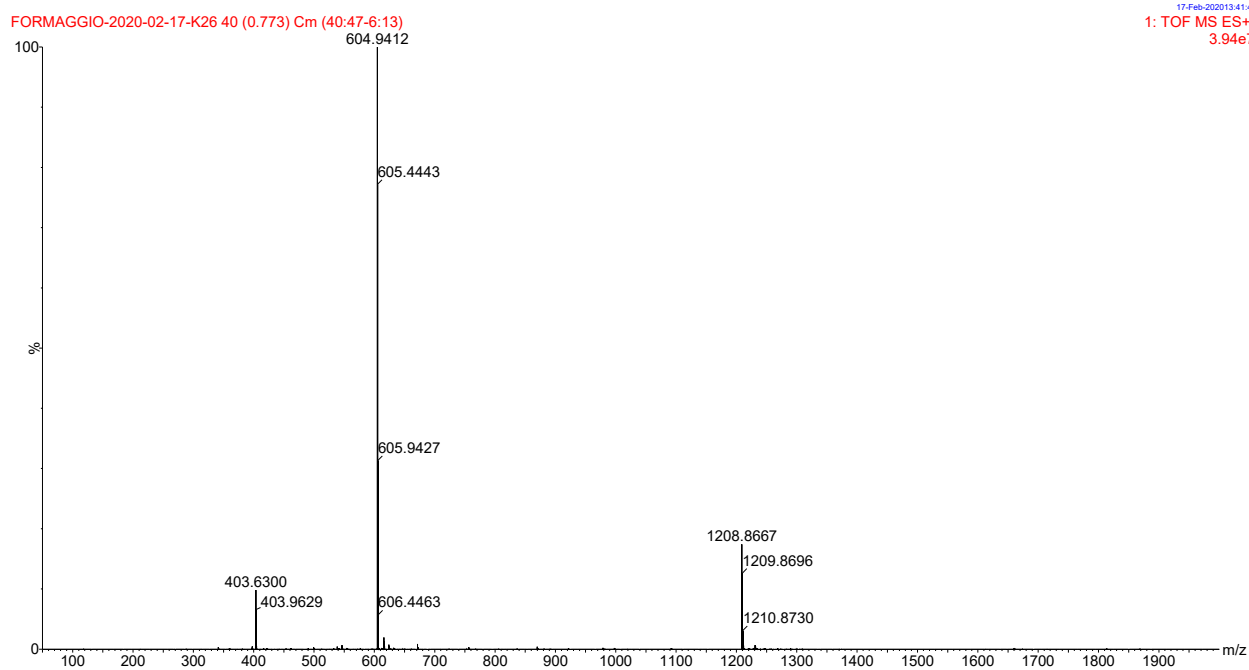

17-Feb-2020 13:41:49  
1: TOF MS ES+  
3.94e7

ESI-MS for peptide 7: [M+H]<sub>calcd.</sub> 1208.8632; [M+H]<sub>found:</sub> 1208.8667, [M+2H<sup>2+</sup>]<sub>found:</sub> 604.9412; [M+3H<sup>3+</sup>]<sub>found:</sub> 403.6300.

peptide **8** (Api8)

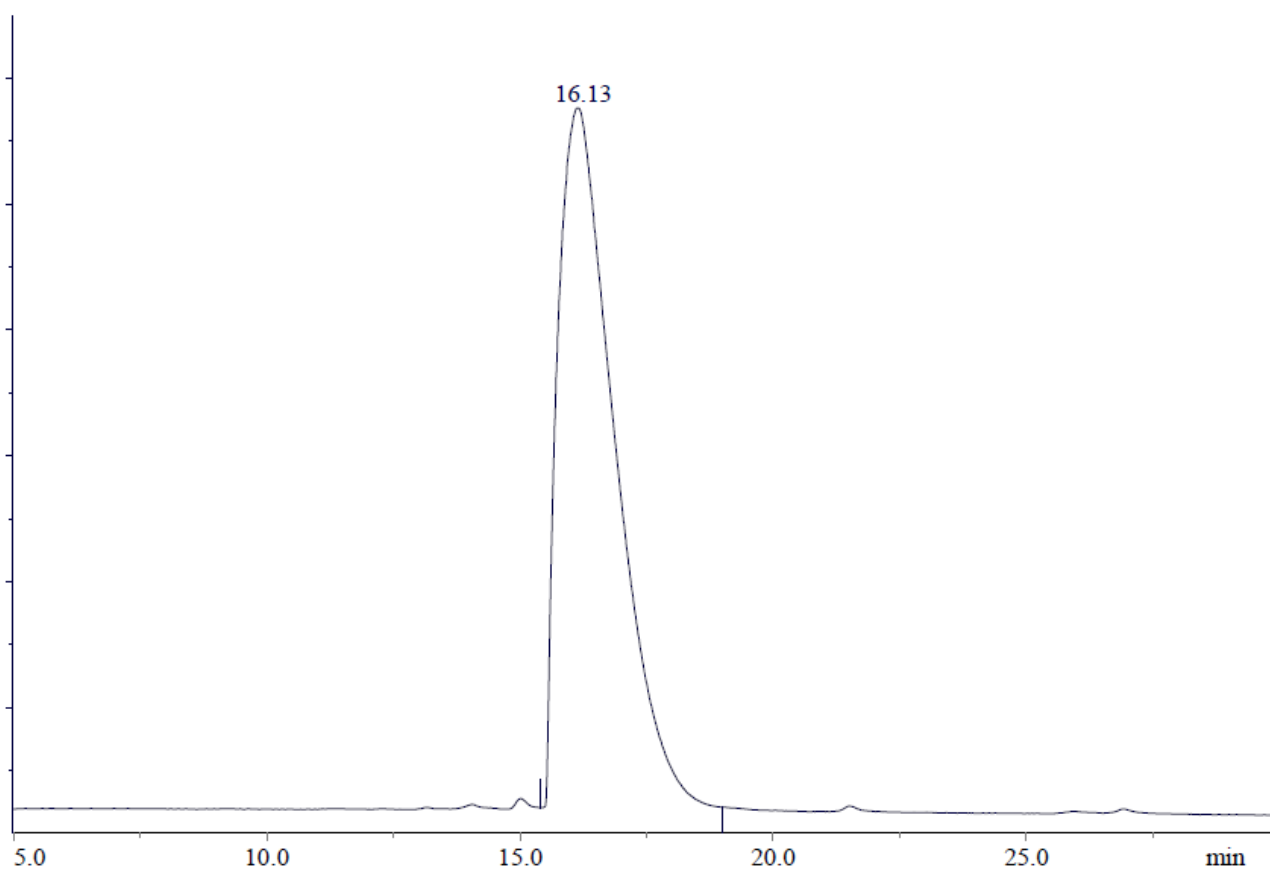

HPLC profile obtained for peptide **8** ([Api<sup>8</sup>]-Tric) (gradient: 45→75% B [CH<sub>3</sub>CN/H<sub>2</sub>O 9:1 + 0.05% TFA] in 30 minutes; flow rate: 1mL/min; C<sub>18</sub> Phenomenex 300Å); R<sub>t</sub> = 16.13 min.

Applied Biosystems Mariner System 5220

Mariner Spec /7:9 (T /0.53:0.70) -3:5 (T -0.53:0.70) ASC[BP = 554.4, 1393]

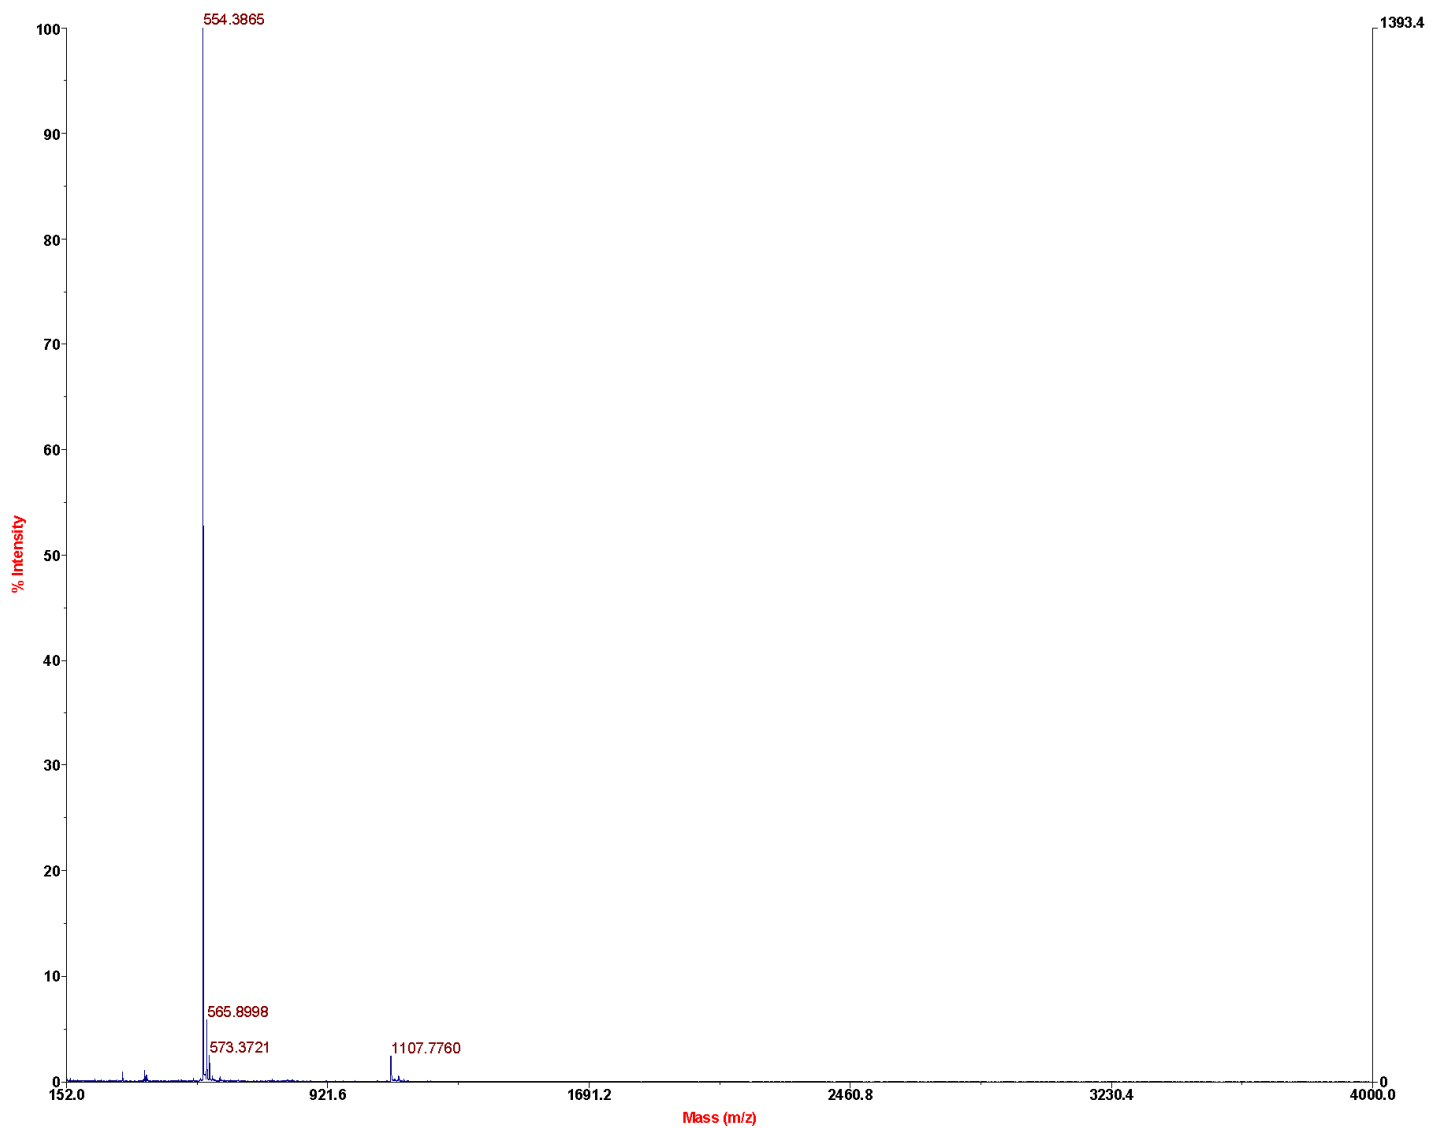

ESI-MS for peptide **8**:  $[M+H]_{\text{calcd.}}$  1107.7427;  $[M+H]_{\text{found}}$  1107.7760,  $[M+2H^{2+}]_{\text{found}}$  554.3865.

# <sup>1</sup>H NMR characterizations

peptide 1 (K25)

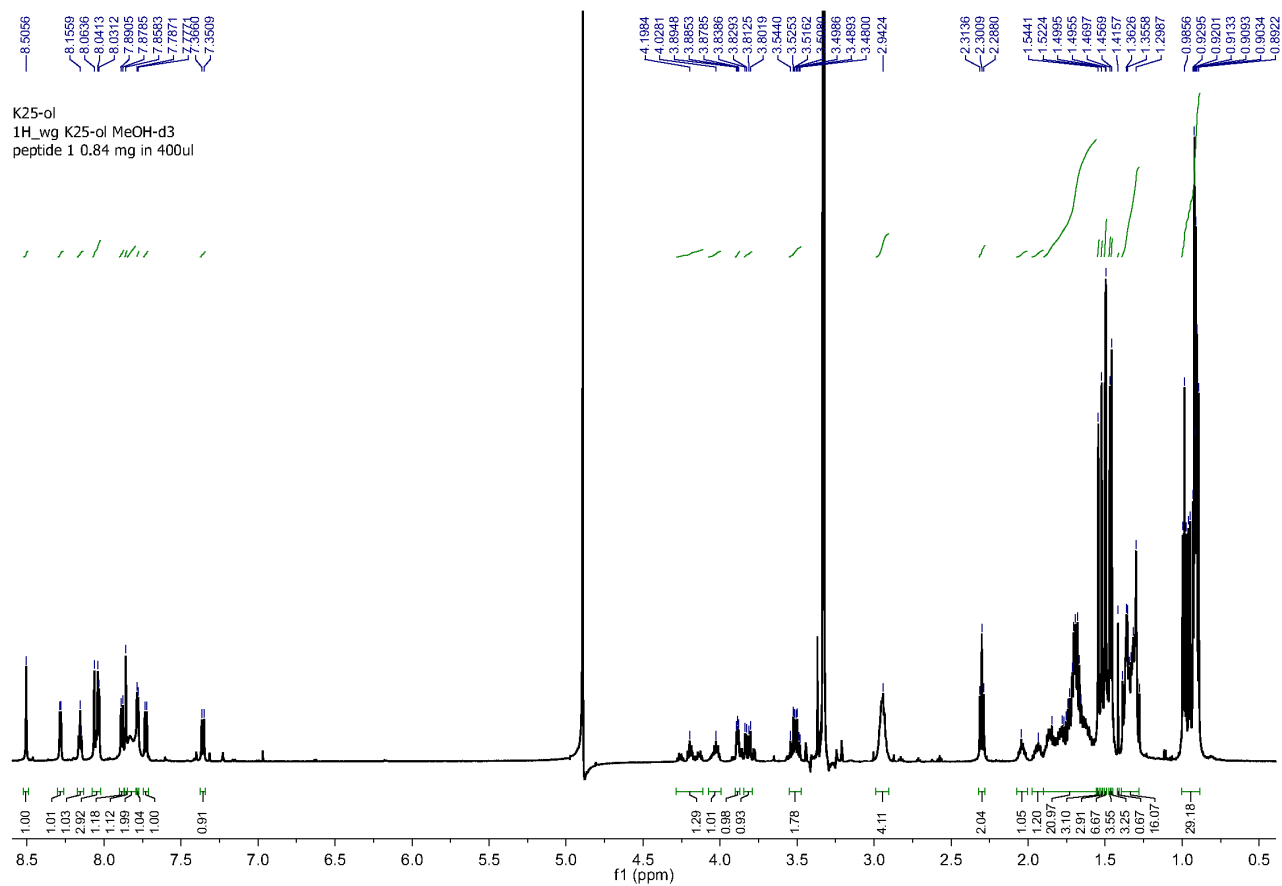

1D <sup>1</sup>H NMR spectrum for peptide 1 in CD<sub>3</sub>OH, 298K, 600MHz (peptide concentration ca. 2 mM).

peptide 2 (K2)

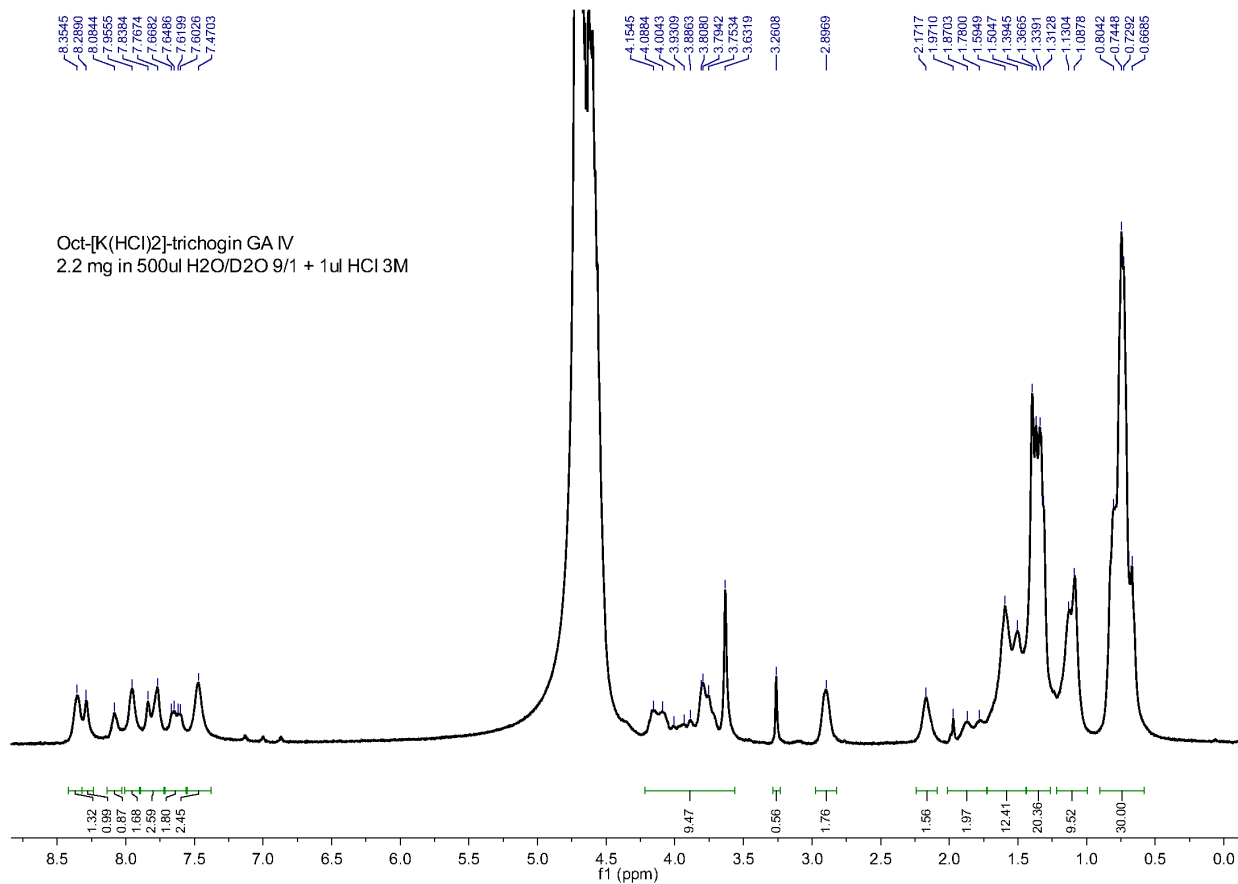

1D <sup>1</sup>H NMR spectrum for peptide 2 in H<sub>2</sub>O/D<sub>2</sub>O 9:1(+ 1μl HCl 3 M), 298K, 400MHz (peptide concentration ca. 4 mM).

peptide 3 (K5)

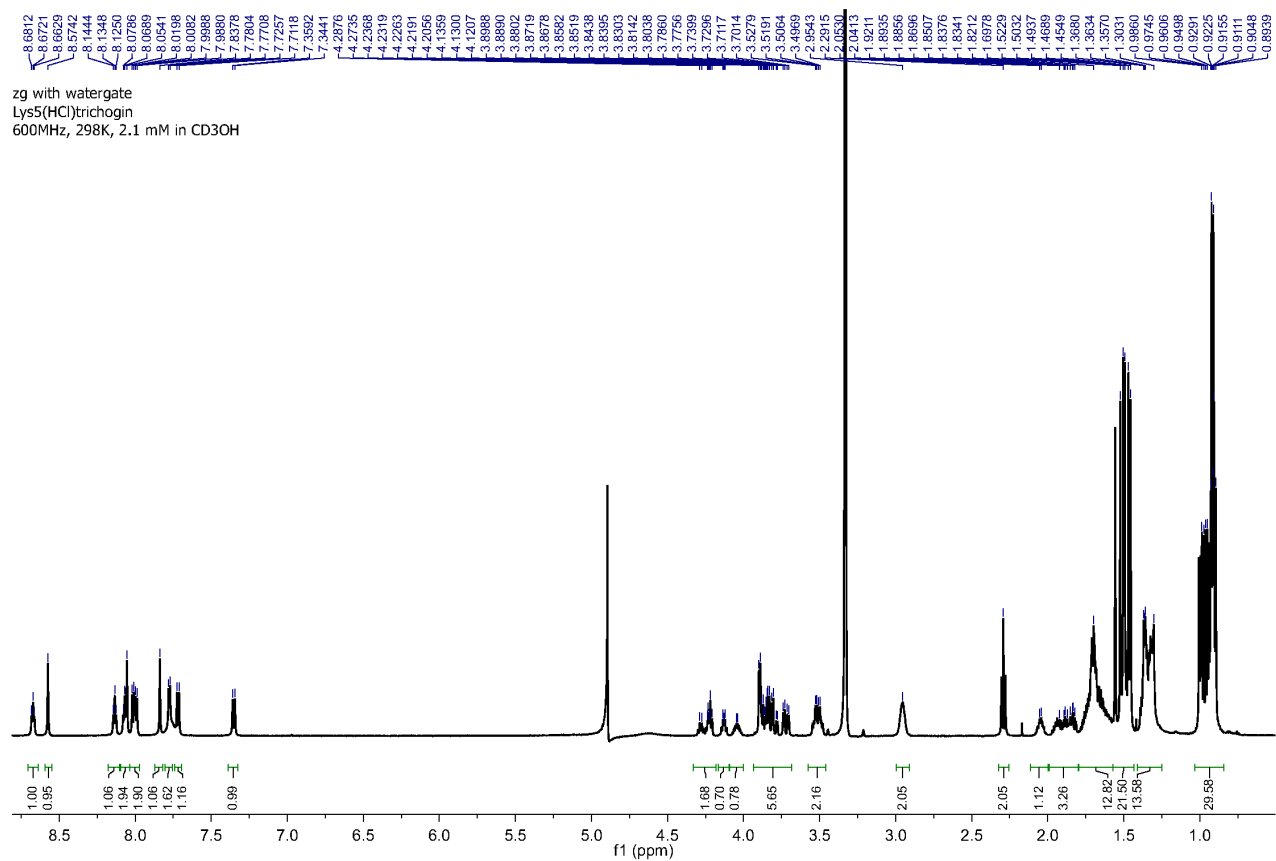

1D  $^1\text{H}$  NMR spectrum for peptide 3 in  $\text{CD}_3\text{OH}$ , 298 K, 600MHz (peptide concentration ca. 2.1 mM).

peptide 4 (K56)

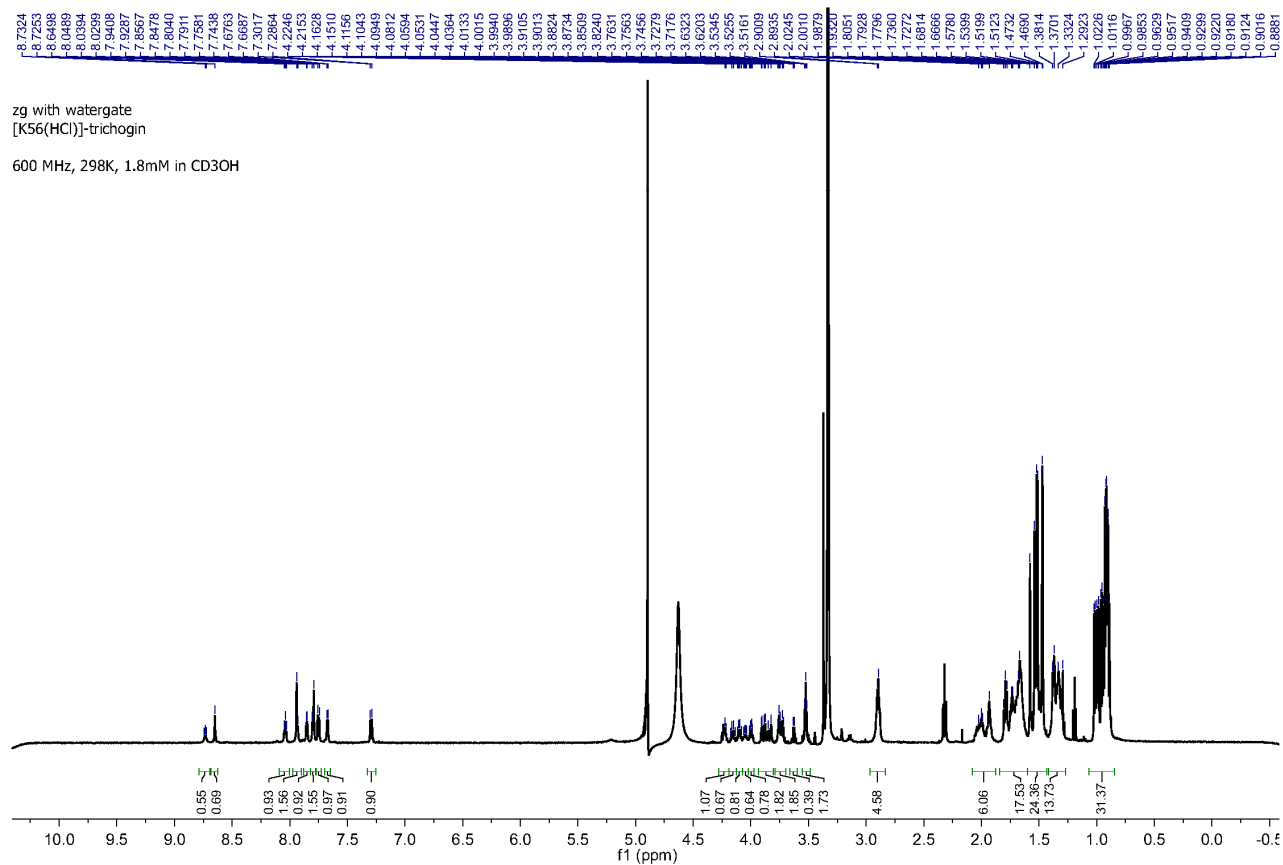

1D <sup>1</sup>H NMR spectrum for peptide 4 in CD<sub>3</sub>OH, 298K, 600MHz (peptide concentration ca. 1.8 mM).

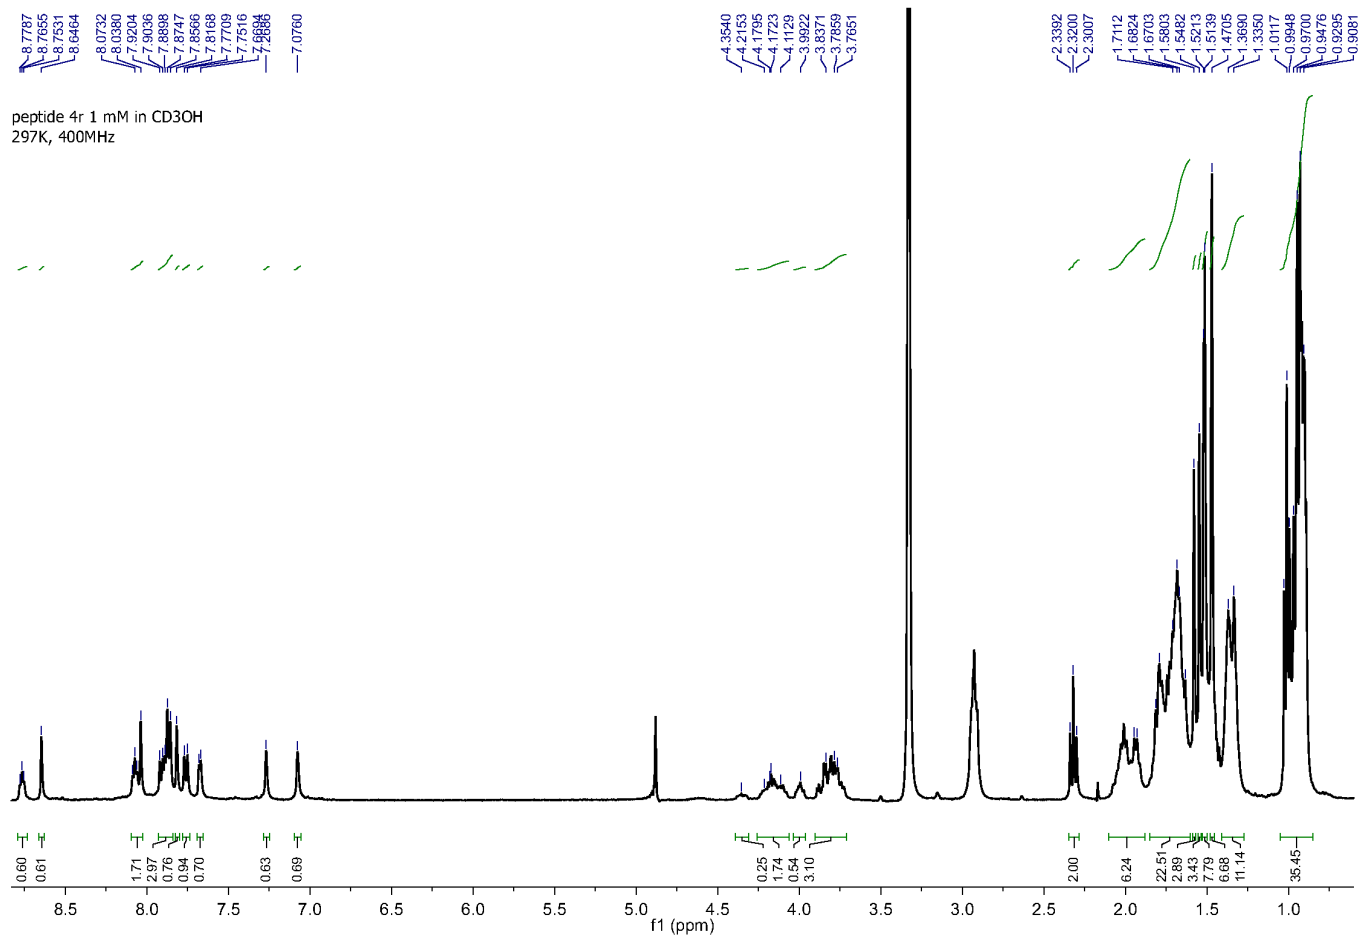

1D  $^1\text{H}$  NMR spectrum for peptide **4r** in  $\text{CD}_3\text{OH}$ , 297K, 400MHz (peptide concentration 1 mM).



peptide 4c

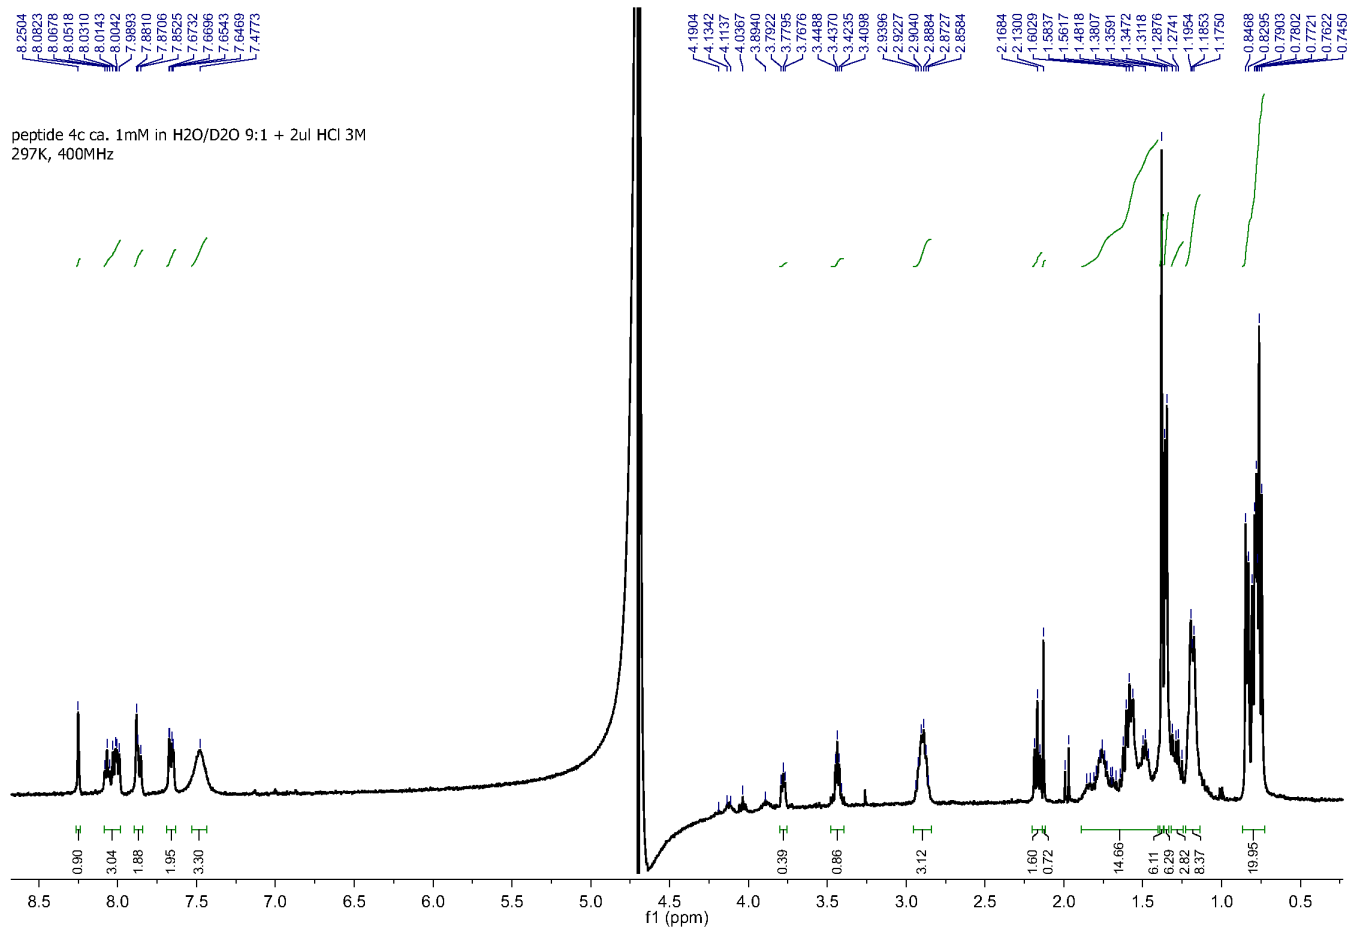

1D <sup>1</sup>H NMR spectrum for peptide **4c** in H<sub>2</sub>O/D<sub>2</sub>O 9:1 (+2μl HCl 3M in D<sub>2</sub>O), 297K, 400MHz (peptide concentration 1 mM).

# peptide 4c1

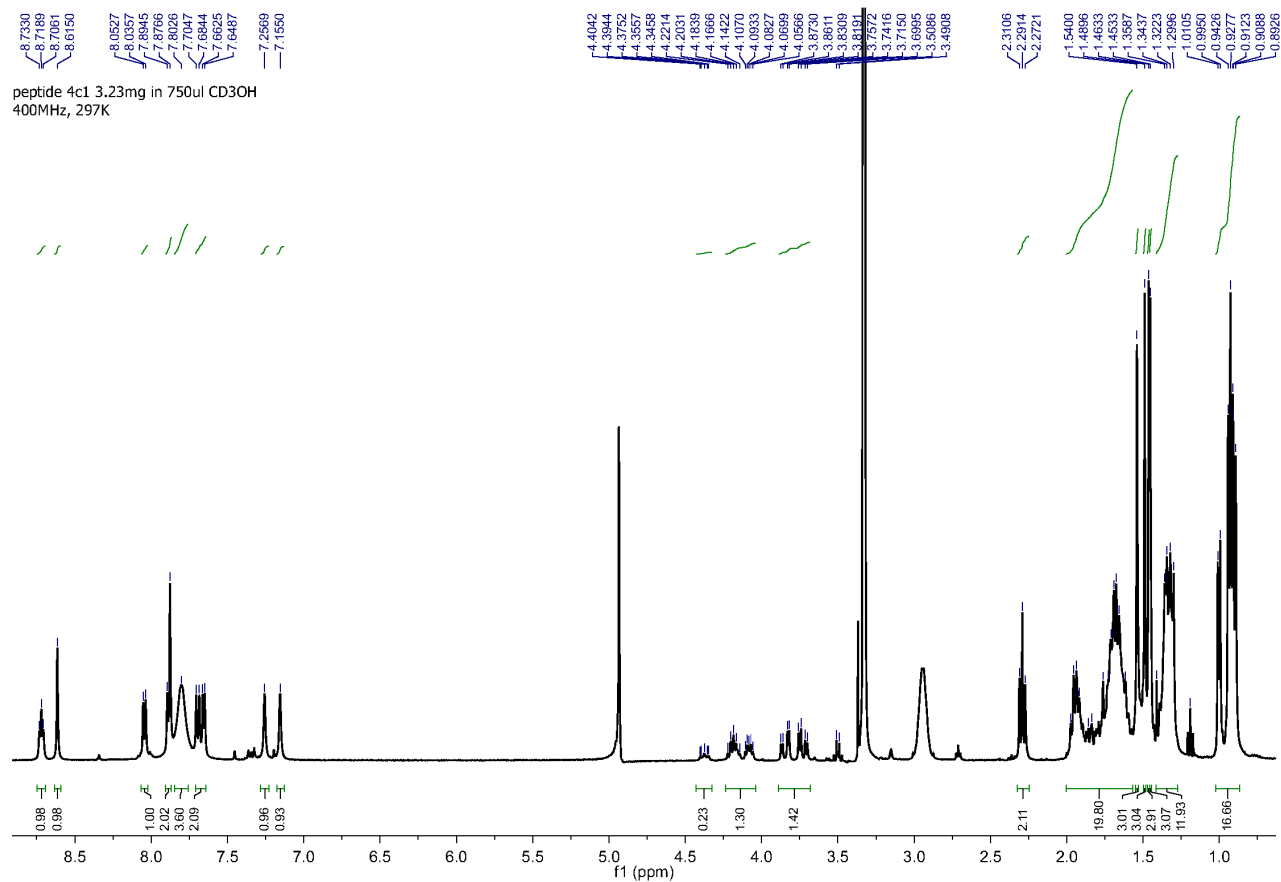

1D  $^1\text{H}$  NMR spectrum for peptide **4c1** in  $\text{CD}_3\text{OH}$ , 297K, 400MHz (peptide concentration ca. 5 mM).

peptide **4c2**

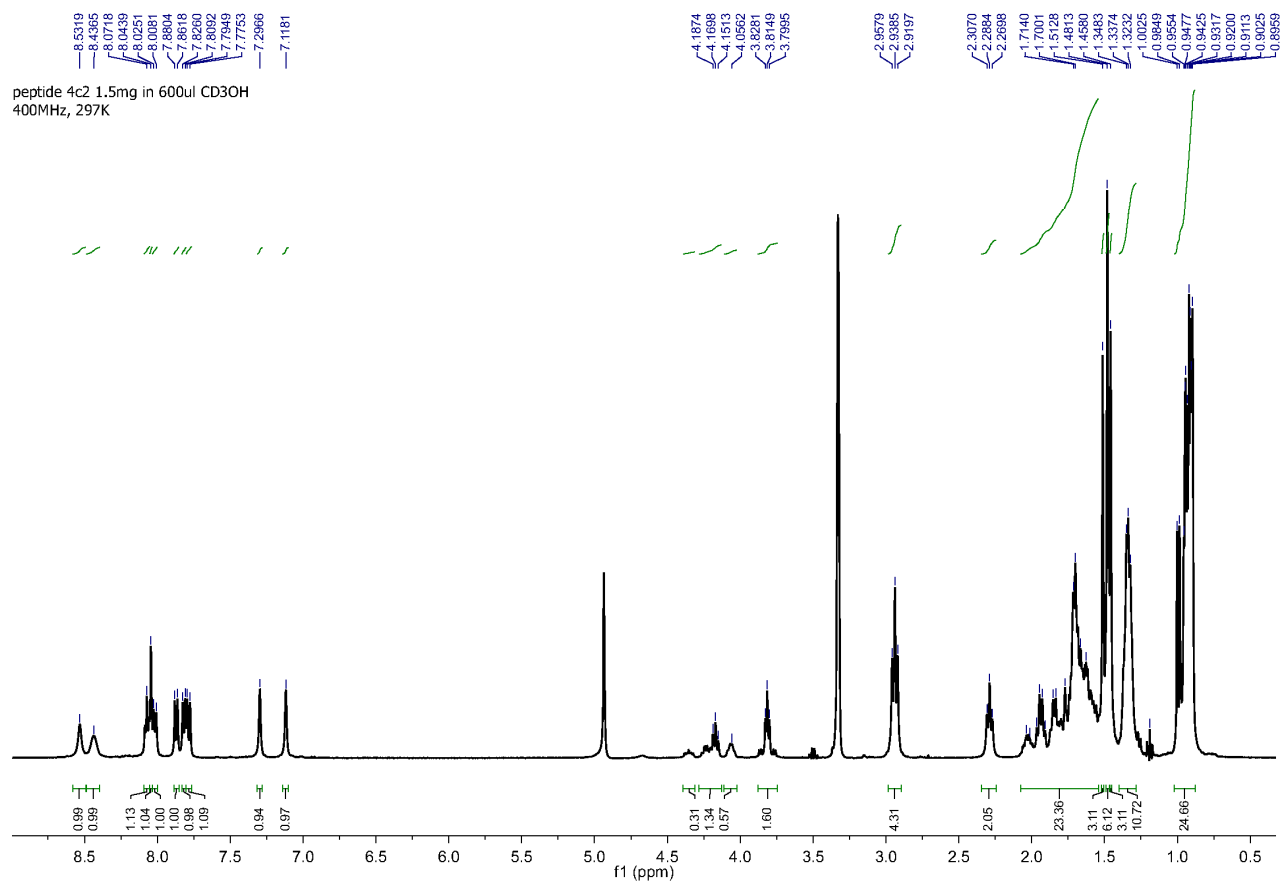

1D  $^1\text{H}$  NMR spectrum for peptide **4c2** in  $\text{CD}_3\text{OH}$ , 297K, 400MHz (peptide concentration ca. 2.6 mM).

## 2D-NMR peptide **4c**

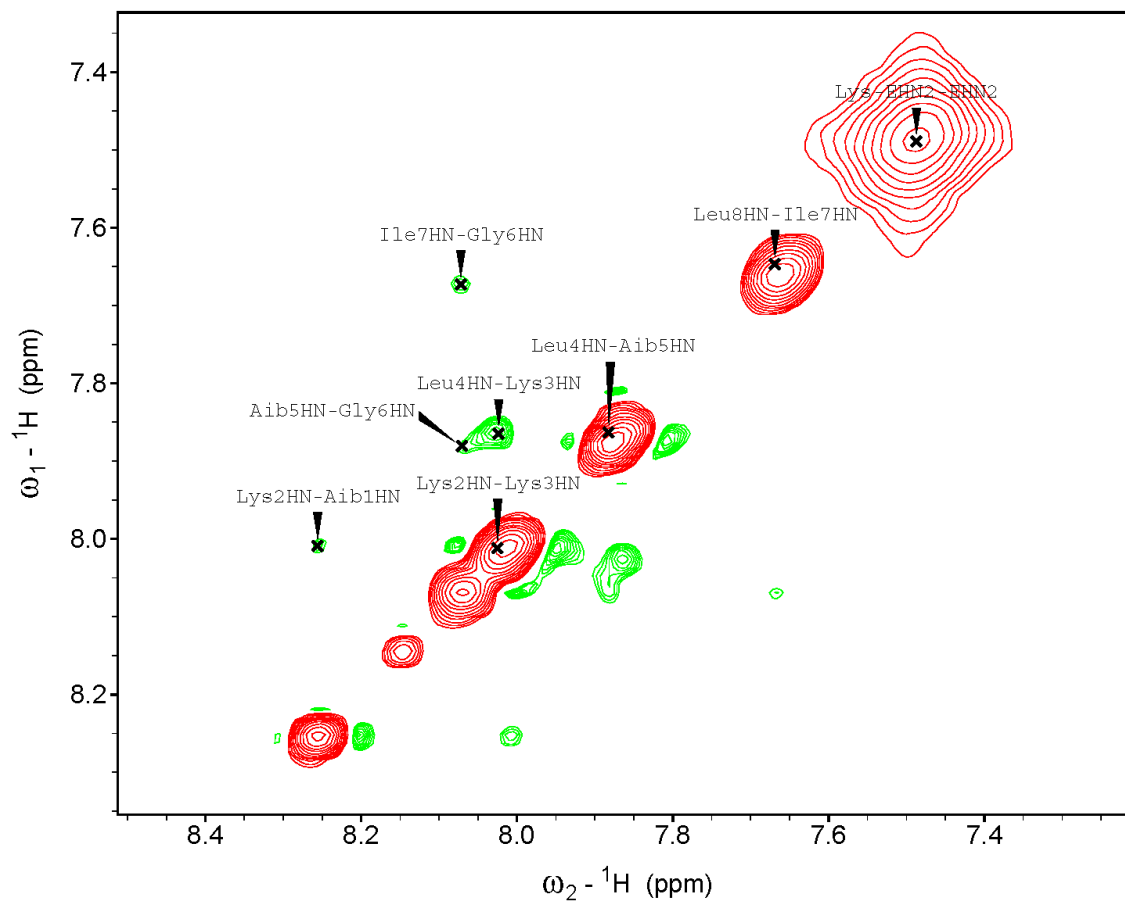

2D  ${}^1\text{H}$  NMR for peptide **4c** in  $\text{H}_2\text{O}/\text{D}_2\text{O}$  9:1 (+3 $\mu\text{l}$  HCl 3M in  $\text{D}_2\text{O}$ ), 297K, 400MHz (peptide concentration 1 mM). NH-NH (amide) cross-peaks region of the ROESY spectrum. All sequential  $\text{NH}_i \rightarrow \text{NH}_{i+1}$  are detectable (apart from those falling under the diagonal).

## 2D-NMR peptide **4c**

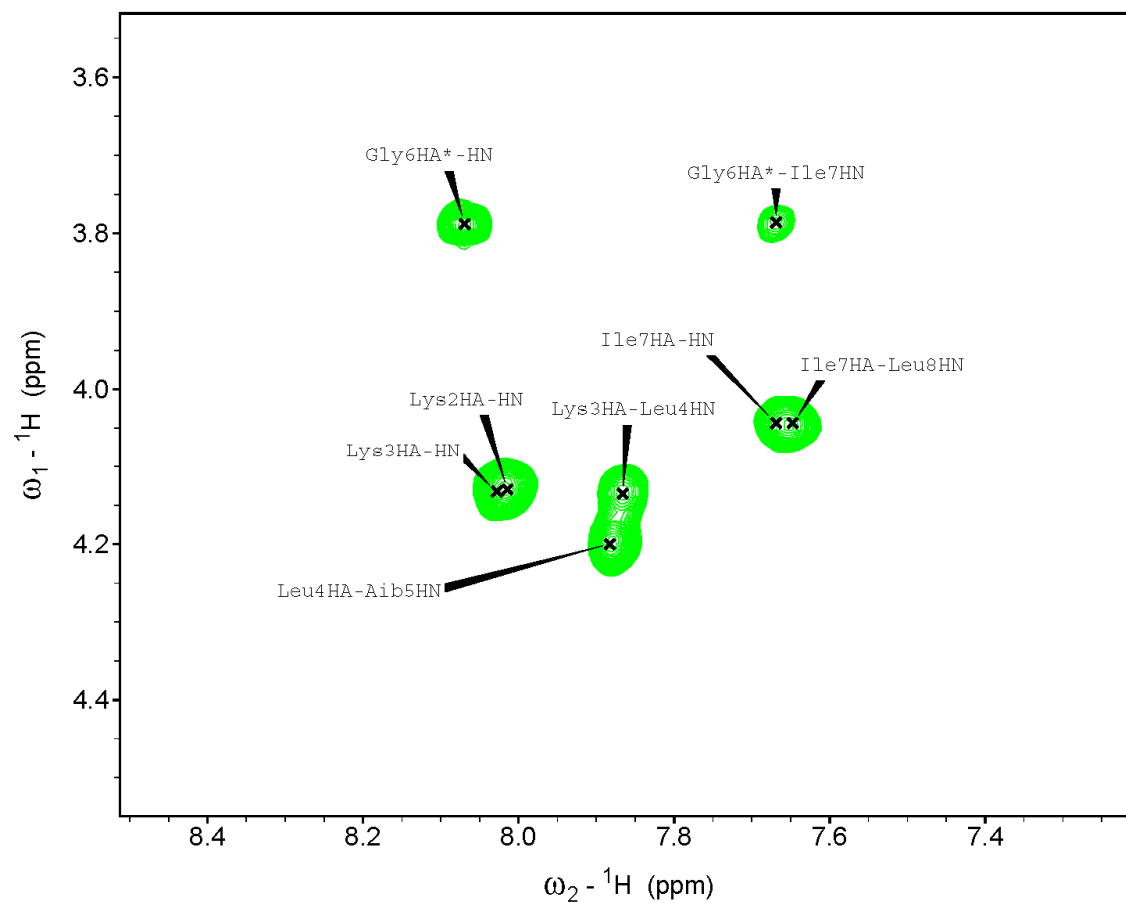

2D  ${}^1\text{H}$  NMR for peptide **4c** in  $\text{H}_2\text{O}/\text{D}_2\text{O}$  9:1 (+3  $\mu\text{l}$  HCl 3M in  $\text{D}_2\text{O}$ ), 297K, 400MHz (peptide concentration 1 mM).  $\alpha\text{H}$ -NH cross-peaks region (*fingerprint region*) of the ROESY spectrum. All sequential  $\alpha\text{H}_i \rightarrow \text{NH}_{i+1}$  are detectable. There are no long-range correlations ( $\alpha\text{H}_i \rightarrow \text{NH}_{i+n}$ ). This observation is (mainly) due to the extensive peak overlap, but it is usually associated with a somewhat flexible helical conformation, in agreement with CD findings.

## 2D-NMR peptide **4c1**

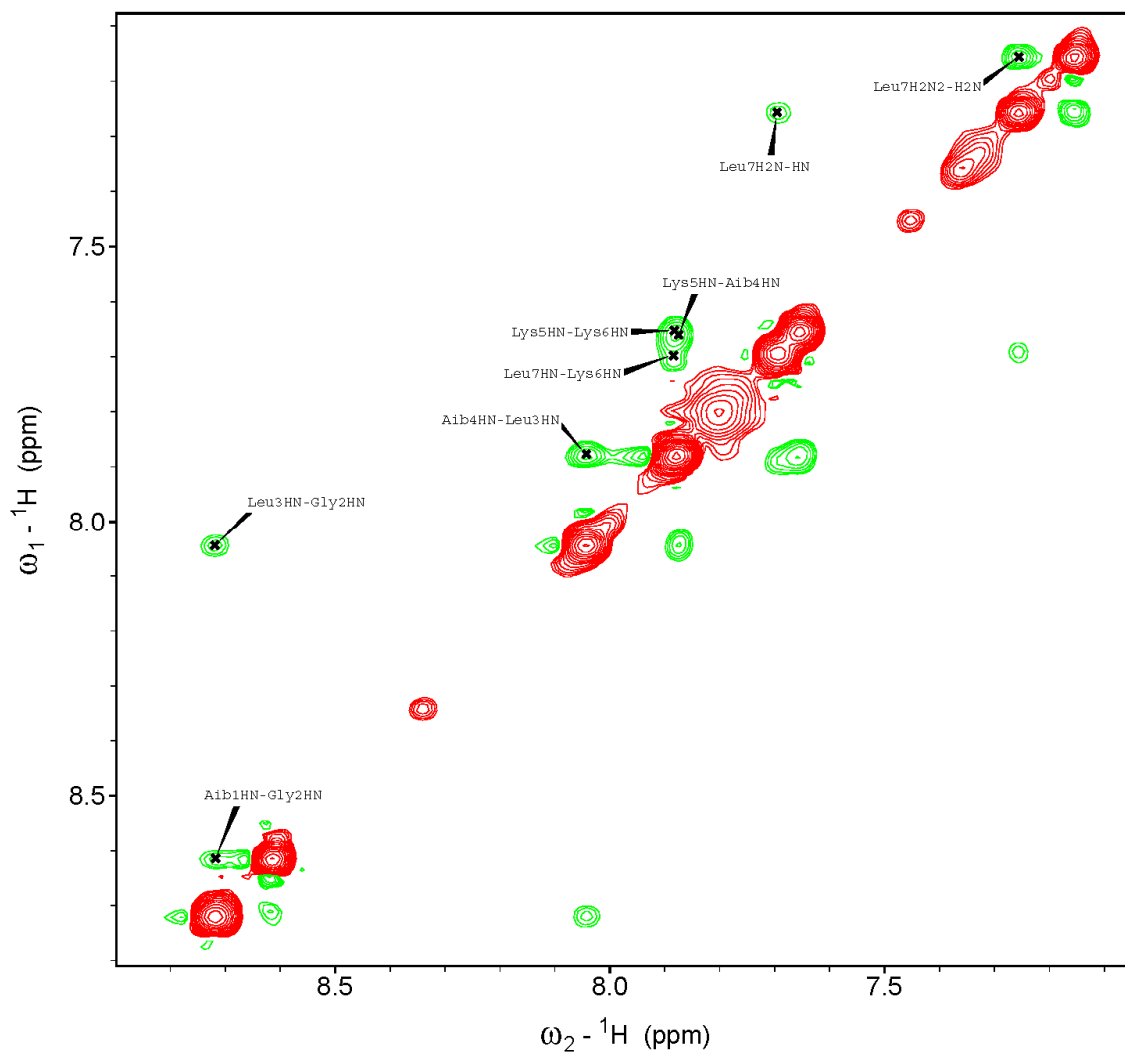

2D  ${}^1\text{H}$  NMR for peptide **4c1** in  $\text{CD}_3\text{OH}$ , 297K, 400MHz (peptide concentration about 5 mM). The figure reports the NH-NH (amide) portion of the ROESY spectrum. All sequential  $\text{NH}_i \rightarrow \text{NH}_{i+1}$  are detectable.

peptide 5 (K6)

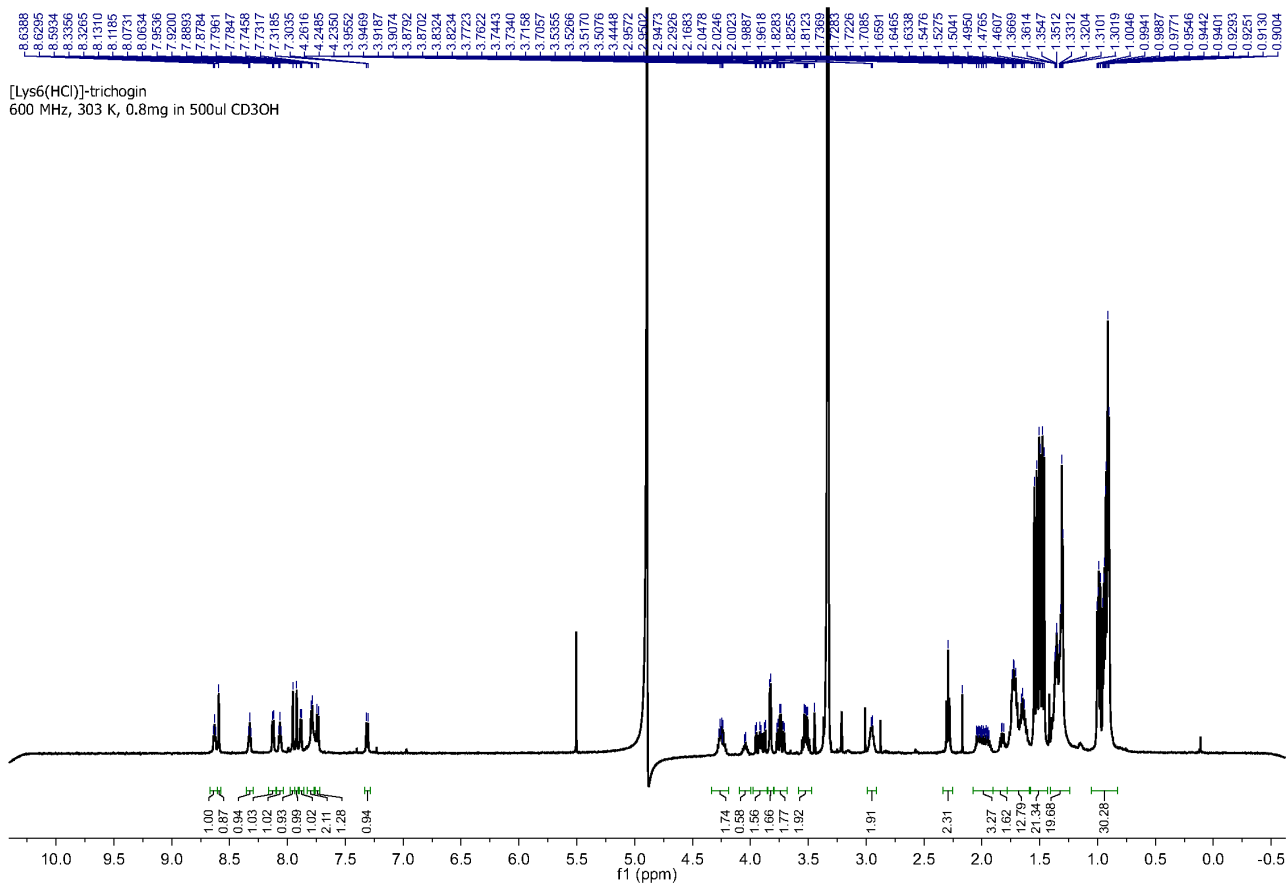

1D  $^1\text{H}$  NMR spectrum for peptide 5 in  $\text{CD}_3\text{OH}$ , 298K, 600MHz (peptide concentration ca. 1.3 mM).

peptide 6 (K5U6)

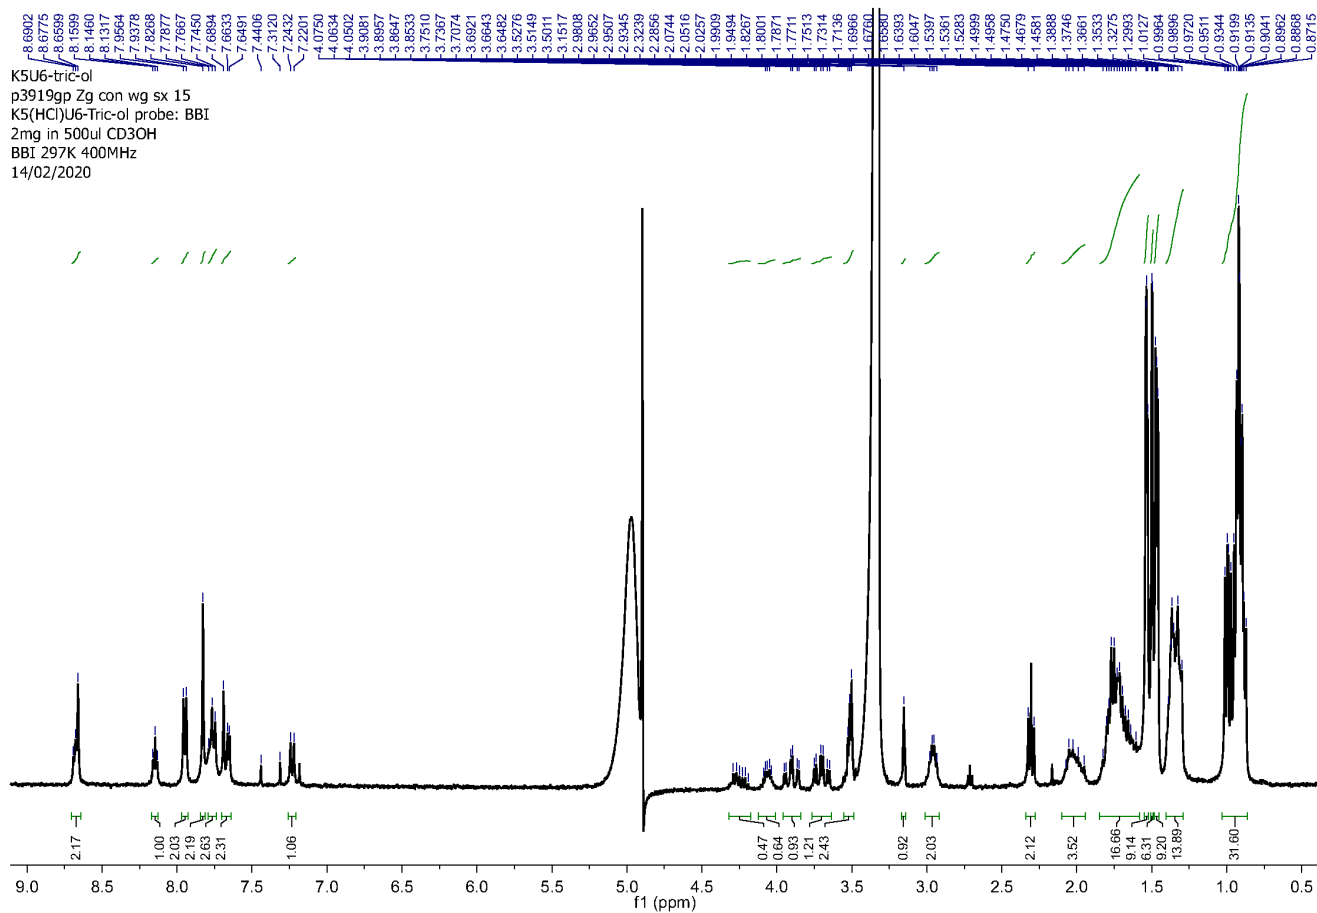

1D <sup>1</sup>H NMR spectrum for peptide 6 in CD<sub>3</sub>OH, 297K, 400MHz (peptide concentration ca. 3 mM).



peptide 7 (K26)

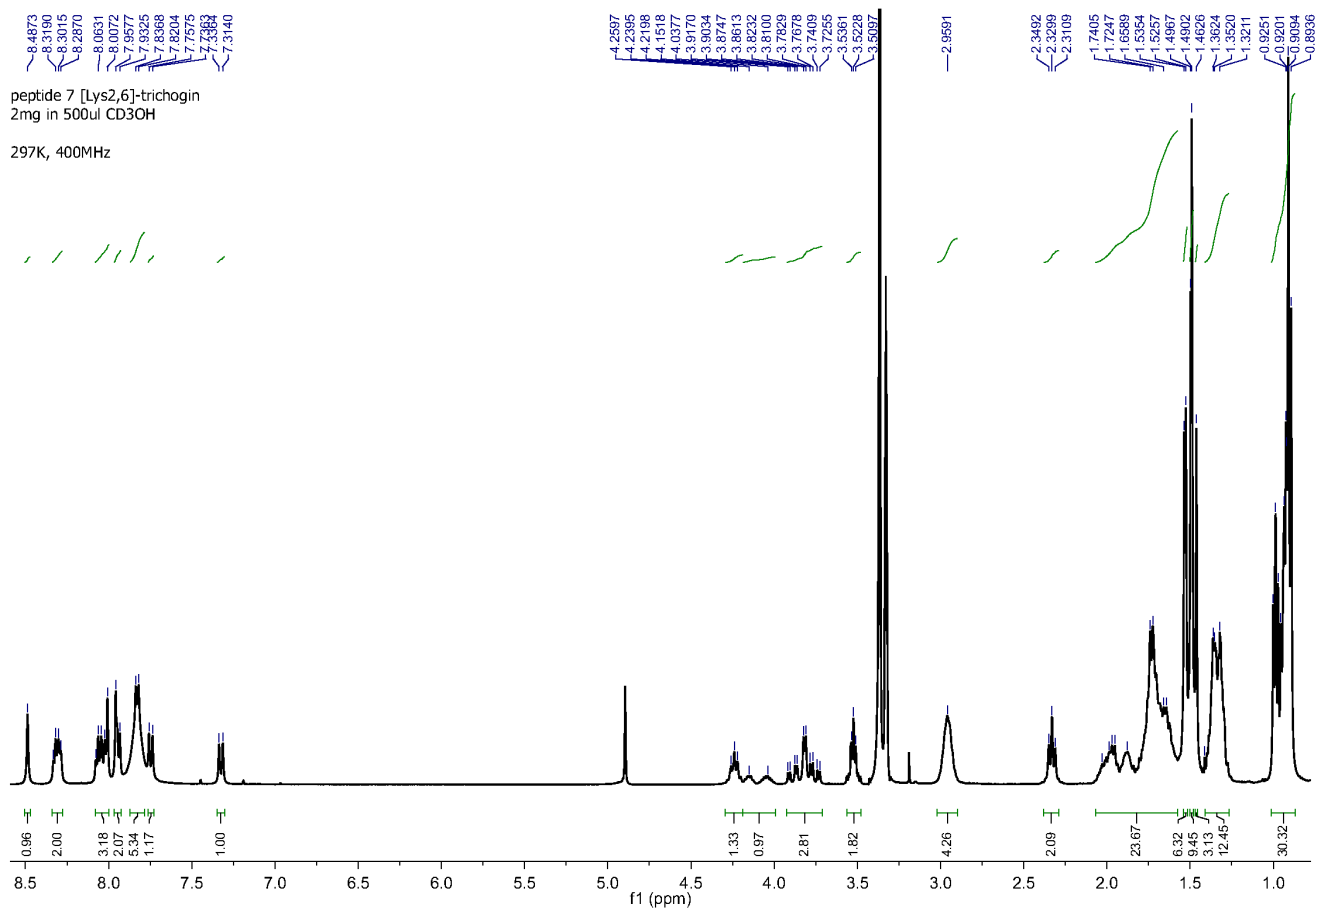

1D <sup>1</sup>H NMR spectrum for peptide 7 in CD<sub>3</sub>OH, 297K, 400MHz (peptide concentration ca. 3 mM).

# peptide **8** (Api8)

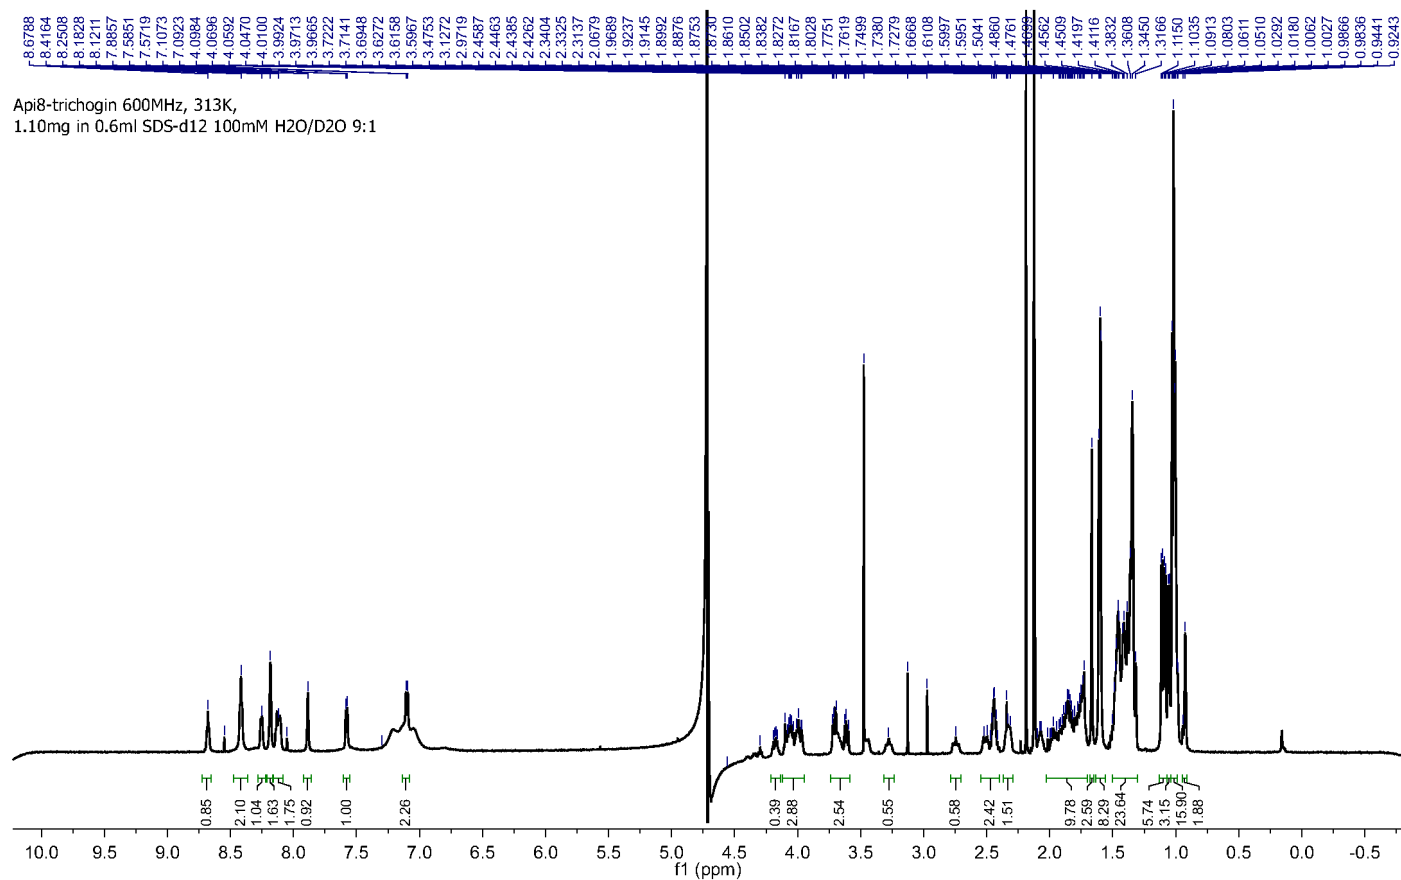

1D  $^1\text{H}$  NMR spectrum for peptide **8** in SDS-d<sub>12</sub> 100mM in H<sub>2</sub>O/D<sub>2</sub>O 9:1, 313K, 600MHz (peptide concentration ca. 2 mM).
